# Supplementary material
Source: HighWire-hosted journal article supplement (https://www.jpn.ca/highwire/filestream/90920/field_highwire_adjunct_files/0/JPN-230008-at-1.pdf)
Supplement: JPN-230008-at-1.pdf [file JPN-230008-at-1.pdf]

**Appendix 1** to Roy J-C, Desmidt T, Dam S, et al. Connectivity patterns of the core resting-state networks associated with apathy in late-life depression. *J Psychiatry Neurosci* 2023.

Copyright © 2023 The Author(s) or their employer(s).

To receive this resource in an accessible format, please contact us at [cmaigroup@cmaj.ca](mailto:cmaigroup@cmaj.ca).

DOI: 10.1503/jpn.230008

*Online appendices are unedited and posted as supplied by the authors.*

## **SUPPLEMENTARY MATERIAL**

### **1. Supplementary Methods**

1.1 Evaluation of apathy

1.2 Effect of apathy on ROI-to-ROI connectivity

1.3 Marginal effect of apathy on intranetwork and internetwork connectivity

1.4 Connectivity analyses adding the MADRS score as covariate

### **2. Supplementary Results**

2.1 Disconnected brain subnetworks between late-life depression and healthy controls

2.2 Assessment of heterogeneity in detected subnetworks between apathy scales

2.3 Mean associations in ROI-to-ROI intra and internetwork connectivity inside the Goal-Oriented Behavioral Network

### **Supplementary Tables**

Table S1. TFNBS identified subnetworks associated with apathy in the depression group

**Appendix 1** to Roy J-C, Desmidt T, Dam S, et al. Connectivity patterns of the core resting-state networks associated with apathy in late-life depression. *J Psychiatry Neurosci* 2023.

Copyright © 2023 The Author(s) or their employer(s).

To receive this resource in an accessible format, please contact us at [cmaigroup@cmaj.ca](mailto:cmaigroup@cmaj.ca).

DOI: 10.1503/jpn.230008

*Online appendices are unedited and posted as supplied by the authors.*

Table S2. Details of the subnetworks identified by TFNBS for each apathy scale

Table S3. Proportion of shared and different components identified by TFNBS between apathy scale

Table S4. Proportion of shared components identified by TFNBS with and without modified MADRS as covariate

### **Supplementary Figures**

Fig S1. Quality control of fMRI data

Fig S2. Subnetworks associated with late-life depression

Fig S3. Subnetworks associated with apathy for each apathy scale

Fig S4. Subnetworks associated with apathy adding the modified MADRS as covariate

**Appendix 1** to Roy J-C, Desmidt T, Dam S, et al. Connectivity patterns of the core resting-state networks associated with apathy in late-life depression. *J Psychiatry Neurosci* 2023.

Copyright © 2023 The Author(s) or their employer(s).

To receive this resource in an accessible format, please contact us at [cmaigroup@cmaj.ca](mailto:cmaigroup@cmaj.ca).

DOI: 10.1503/jpn.230008

*Online appendices are unedited and posted as supplied by the authors.*

## **1. Supplementary Methods**

### **1.1 Evaluation of apathy**

Apathy was assessed by a trained old-age psychiatrist using three scales.

The clinician-rated version of the Apathy Evaluation Scale, is a semi-structured interview which evaluates apathy from the patient's reported interests, activities and daily routine during the four last weeks. This scale consists of 18 items, each item being scored on a 4-point Likert scale. The items evaluate the cognitive, behavior or emotional dimension of apathy. The total score ranges from 18 to 72, with higher scores indicating more apathy. The AES is only validated from its total score<sup>1</sup>, as a continuous scale, while the use of a threshold for classifying patients performs modestly<sup>2</sup>.

The Apathy Motivation Index is an 18-item self-report questionnaire which assesses apathy in terms of Behavioral Activation (tendency to self-initiate goal-directed behavior), Emotional Sensitivity (affective responses) and Social Motivation (level of engagement in social interactions). It uses a 5-point Likert scale with higher scores indicating more severe apathy.

**Appendix 1** to Roy J-C, Desmidt T, Dam S, et al. Connectivity patterns of the core resting-state networks associated with apathy in late-life depression. *J Psychiatry Neurosci* 2023.

Copyright © 2023 The Author(s) or their employer(s).

To receive this resource in an accessible format, please contact us at [cmaigroup@cmaj.ca](mailto:cmaigroup@cmaj.ca).

DOI: 10.1503/jpn.230008

*Online appendices are unedited and posted as supplied by the authors.*

The Apathy Diagnostic Criteria of the 2018 international consensus group is a clinician-rated evaluation based on 4 criteria. First, a quantitative reduction of goal-directed activity in comparison to the patient's previous level of functioning must be observed. Second, symptoms must persist for at least four weeks and affect at least two of the three apathy dimensions among a behavior/cognition, emotion or social dimension. Third, apathy should cause identifiable functional impairments. Finally, apathy should not be fully explained by other factors, such as effects of a substance or major changes in the patient's environment.

## **1.2 Connectivity analyses adding the MADRS score as covariate**

As requested by a reviewer, we performed connectivity analyses adding the MADRS total score as covariates and found evidence for multicollinearity. All apathy scores were correlated with depression severity as expected (AMI:  $r = 0.42$ , AES:  $r = 0.3$ ). Adding MADRS led to less robust estimation as the variance of the MADRS estimate was 40% to 70% higher than what could be expected without multicollinearity, and 20% to 60% higher for the apathy estimate (AES, AMI or DCA). To reduce the multicollinearity induced by adding the MADRS, we performed a

**Appendix 1** to Roy J-C, Desmidt T, Dam S, et al. Connectivity patterns of the core resting-state networks associated with apathy in late-life depression. *J Psychiatry Neurosci* 2023.

Copyright © 2023 The Author(s) or their employer(s).

To receive this resource in an accessible format, please contact us at [cmaigroup@cmaj.ca](mailto:cmaigroup@cmaj.ca).

DOI: 10.1503/jpn.230008

*Online appendices are unedited and posted as supplied by the authors.*

principal component analysis on the MADRS scores. We found a dimension which gets the largest contribution from the lassitude and anhedonia items, together with concentration and vegetative symptoms, and is the third to explain the most of the total variance (13%). We selected this dimension and labeled it an "apathy dimension". As the first and third dimensions relates respectively to mood and apathy, we plotted the correlation of the total items of the MADRS against the first and third principal components to identify the items which were correlated to these dimensions. We found that the lassitude, anhedonia, concentration and tension items had a similar direction of their projection in both dimensions. We thus chose the MADRS without these items as a covariate for depression severity in the subsequent connectivity models. We performed a multiple regression adding the MADRS modified score as covariate and found reduced multicollinearity in the models tested. We then ran TFNBS adding this modified MADRS score, with 1000 permutations instead of 5000 in our original analysis, and found that the brain hubs common to the three scales are comparable between the models with and without the covariates. The connectivity results are presented in **Table S5** and **Figure S6**. As the addition of the modified MADRS score did not provide a significant gain to the original results while being subject to

**Appendix 1** to Roy J-C, Desmidt T, Dam S, et al. Connectivity patterns of the core resting-state networks associated with apathy in late-life depression. *J Psychiatry Neurosci* 2023.

Copyright © 2023 The Author(s) or their employer(s).

To receive this resource in an accessible format, please contact us at [cmaigroup@cmaj.ca](mailto:cmaigroup@cmaj.ca).

DOI: 10.1503/jpn.230008

*Online appendices are unedited and posted as supplied by the authors.*

a lack of robustness because of the exploratory selection of items and adding small variance to the estimator, we report these results in the **Supplementary Material** but not in the **Main Manuscript**.

## **2. Supplementary Results**

### **2.1 Disconnected brain subnetworks between late-life depression and healthy controls**

For the DMN intra-network connectivity, the NBS identified four subnetworks associated with the LLD group ( $p_{\text{fwe-corrected}} < 0.001$ , **Table S1, Fig. S3**), consisting of 416 regions. Post-hoc analyses suggest that intranetwork connectivity decreases in the LLD group, mainly for prefrontal polar areas (10\_r, 10\_d), frontal dorso-lateral areas (L\_9M, L\_9A), precuneus regions (31pd, 31pv) and in middle and superior temporal regions (TE1\_m, TE1\_a, TE2\_a, TGd, STSva, STSvp). Conversely, parahippocampal and hippocampal regions were hyperconnected (PHA1, PHA2, EC, H).

For the CON intra-network connectivity, the NBS identified one subnetwork associated with the LLD group ( $p_{\text{fwe-corrected}} < 0.0001$ , **Table S1, Fig. S3**), comprising 72 regions. Post-hoc analyses

**Appendix 1** to Roy J-C, Desmidt T, Dam S, et al. Connectivity patterns of the core resting-state networks associated with apathy in late-life depression. *J Psychiatry Neurosci* 2023. Copyright © 2023 The Author(s) or their employer(s).

To receive this resource in an accessible format, please contact us at [cmajgroup@cmaj.ca](mailto:cmajgroup@cmaj.ca).

DOI: 10.1503/jpn.230008

*Online appendices are unedited and posted as supplied by the authors.*

suggest that, except for six regions, intranetwork connectivity decreases in the LLD group, notably for the middle insula (MI) and related fronto-opercular regions (FOP\_4, FOP\_5), the dorsolatero-prefrontal area B\_46, the dorsofrontal regions 6\_ma and 5\_mv, and the mid-cingulum (33pr).

For the FPN intra-network connectivity, we identified one subnetwork associated with LLD ( $p_{fwe-corrected} < 0.0001$ , **Table S1, Fig. S3**), consisting of 48 regions. Post-hoc analyses suggest that intranetwork connectivity decreases in the LLD group for two main regions: the dorsolateral prefrontal areas p9-46v and IFJp. Conversely, the regions whose connectivity positively correlated with depression were the left anterior insula AVI, the lateral parietal region PFM, the region POS2, and the middle posterior temporal region TE1p.

## **2.2 Assessment of heterogeneity in detected subnetworks between apathy scales**

Connectivity matrices for each resting-state network are presented in **Figure S5**. For the Default-Mode network (DMN), we found a pronounced tendency of hypoconnectivity associated with apathy severity across the three scales. Contrary to the AES,

**Appendix 1** to Roy J-C, Desmidt T, Dam S, et al. Connectivity patterns of the core resting-state networks associated with apathy in late-life depression. *J Psychiatry Neurosci* 2023.

Copyright © 2023 The Author(s) or their employer(s).

To receive this resource in an accessible format, please contact us at [cmaigroup@cmaj.ca](mailto:cmaigroup@cmaj.ca).

DOI: 10.1503/jpn.230008

*Online appendices are unedited and posted as supplied by the authors.*

the AMI and DCA scores had a subset of regions which connectivity was positively associated with apathy. However, these positive associations were not robust across both scales. Concerning the fronto-parietal network (FPN), we observed a high similarity between the AES and the DCA, with increased connectivity associated with apathy. On the other hand, the AMI scale was more heterogenous, with overall hypoconnected ROIs except between regions L\_s6-8 and L\_i6-8, and L\_a10p and L\_p10p. Both pairs of ROIs are involved in motor control and working memory of spatial information which might be impeded in apathy in LLD. These results suggest that FPN hyperconnectivity might mediate social apathy in LLD. The heterogeneity between the scales also suggests that the third-person observation of apathy provides more concordant results on FPN activity associated with apathy than self-rated AMI. For the Cingulo-opercular network (CON), we observed an increased connectivity for both the AES and the AMI scales, but with larger effect sizes for the AMI scale. This suggests that CON activity is impaired for social oriented-behavior in LLD apathy. As the CON is also implied in interoceptive processing, an alternative explanation would be that, being a self-rated scale, higher AMI scores might be associated with higher self-perception of apathy and thus hyperactivity at rest within the CON.



**Appendix 1** to Roy J-C, Desmidt T, Dam S, et al. Connectivity patterns of the core resting-state networks associated with apathy in late-life depression. *J Psychiatry Neurosci* 2023.

Copyright © 2023 The Author(s) or their employer(s).

To receive this resource in an accessible format, please contact us at [cmaigroup@cmaj.ca](mailto:cmaigroup@cmaj.ca).

DOI: 10.1503/jpn.230008

*Online appendices are unedited and posted as supplied by the authors.*

**Table S3** reports the percentage of shared regions and shared direction of the effect size in intra-network connectivity between each pair of apathy scale (*i.e.* positive or negative association). We observe that the percentage of shared regions is less than 15% for each pair of scale. When comparing the intersection between the three scales, we have less than 5% of common ROIs between the scales. Concerning the proportion of shared association between apathy and brain regions connectivity, we observe that approximately half of the regions has similar associations with apathy for each scale-to-scale comparison in the DMN and FPN. However, when compared between the three scales of apathy, we observe that less than 20% of the ROIs have similar association with apathy. For the CON, we only found a subnetwork associated with the scores at AES and the AMI. For this scale, 13% of the detected ROIs had the same direction of the associations with apathy.

**Appendix 1** to Roy J-C, Desmidt T, Dam S, et al. Connectivity patterns of the core resting-state networks associated with apathy in late-life depression. *J Psychiatry Neurosci* 2023. Copyright © 2023 The Author(s) or their employer(s).  
 To receive this resource in an accessible format, please contact us at [cmajgroup@cmaj.ca](mailto:cmajgroup@cmaj.ca).

DOI: 10.1503/jpn.230008

*Online appendices are unedited and posted as supplied by the authors.*

## Supplementary Tables

**Table S1: TNFBS identified subnetworks associated with apathy in the depression group**

| Brain Networks | Apathy Diagnostic criteria |      |               | AMI        |      |               | AES        |      |               | Depression |      |               |
|----------------|----------------------------|------|---------------|------------|------|---------------|------------|------|---------------|------------|------|---------------|
|                | Num. Edges                 | pFWE | Strength pFWE | Num. Edges | pFWE | Strength pFWE | Num. Edges | pFWE | Strength pFWE | Num. Edges | pFWE | Strength pFWE |
| <b>DMN</b>     | 154                        | 0.99 | ***           | 154        | 0.99 | ***           | 154        | 0.99 | ***           | 416        | 0.96 | ***           |
| <b>CON</b>     | 72                         | 0.98 | 0.08          | 72         | 0.99 | ***           | 72         | 0.99 | <b>0.003</b>  | 72         | 0.98 | ***           |

**Appendix 1** to Roy J-C, Desmidt T, Dam S, et al. Connectivity patterns of the core resting-state networks associated with apathy in late-life depression. *J Psychiatry Neurosci* 2023. Copyright © 2023 The Author(s) or their employer(s).

To receive this resource in an accessible format, please contact us at [cmajgroup@cmaj.ca](mailto:cmajgroup@cmaj.ca).

DOI: 10.1503/jpn.230008

*Online appendices are unedited and posted as supplied by the authors.*

|                                       |    |      |            |    |      |              |    |      |               |    |      |            |
|---------------------------------------|----|------|------------|----|------|--------------|----|------|---------------|----|------|------------|
| <b>FPN</b>                            | 47 | 0.99 | <b>***</b> | 48 | 0.97 | <b>***</b>   | 48 | 0.96 | <b>***</b>    | 48 | 0.96 | <b>***</b> |
| <b>Somatomotor</b>                    | 36 | 0.92 | 0.04       | 35 | 0.96 | 0.02         | 36 | 0.91 | 0.04          | 32 | 0.98 | 0.04       |
| <b>Goal-oriented Behavior Network</b> | 36 | 0.9  | <b>***</b> | 35 | 0.97 | <b>0.001</b> | 32 | 0.99 | <b>0.0004</b> |    |      |            |

**AES**: Apathy Evaluation Scale; **AMI**: Apathy Motivation Index; Num. Edges - number of edges in the subnetwork associated with a given variable; pFWE - FWE p-values for the number of edges in the subnetwork; Strength FWE - FWE p-values for the subnetwork strength (i.e. the sum of edges in the subnetwork). Significant p-values ( $p < 0.003$ ) are reported in bold; for  $p \ll 0.0001$ : \*\*\*.

**Appendix 1** to Roy J-C, Desmidt T, Dam S, et al. Connectivity patterns of the core resting-state networks associated with apathy in late-life depression. *J Psychiatry Neurosci* 2023. Copyright © 2023 The Author(s) or their employer(s).

To receive this resource in an accessible format, please contact us at [cmajgroup@cmaj.ca](mailto:cmajgroup@cmaj.ca).

DOI: 10.1503/jpn.230008

*Online appendices are unedited and posted as supplied by the authors.*

**Table S2: Details of the subnetworks identified by threshold-free network-based statistics for each apathy scale**

| <b>Network</b> | <b>ROI-ROI</b> | <b>AES - t-value</b> | <b>AMI - t-value</b> | <b>Apathy - t-value</b> | <b>Robust</b> |
|----------------|----------------|----------------------|----------------------|-------------------------|---------------|
| DMN            | L_47l.L_p32    | -4.82944420351751    | -2.83926649703878    | -4.00244804165416       | 1             |
| DMN            | R_a24.R_v23ab  | -1.50700188189692    | 1.16700792406012     | -1.89196585500644       | 1             |
| DMN            | L_7m.R_10v     | -1.63414604241206    | 1.12866491023762     | -0.826729322488005      | 1             |
| DMN            | R_23d.R_8Av    | -4.20567151362585    | -2.30345153888134    | -4.42031101933068       | 1             |
| DMN            | L_PreS.L_TE1m  | -4.47781797818824    | -2.2059117993882     | -1.07210012803776       | 1             |
| DMN            | L_10pp.L_PreS  | -5.49245577376437    | -3.46900155594774    | -4.80596332006686       | 1             |
| DMN            | R_a24.R_s32    | -2.27393939460713    | 0.342344791333879    | -2.54561057239904       | 1             |
| DMN            | L_10pp.R_47m   | -4.36928851188717    | -2.18864843998814    | NA                      | 0             |
| DMN            | L_p32.R_9a     | -3.97097675373597    | NA                   | NA                      | 0             |
| DMN            | L_10d.L_25     | -3.37592579105133    | NA                   | -2.59972383764973       | 0             |
| DMN            | L_10pp.R_31pd  | -3.70548252151471    | NA                   | -2.93078574535711       | 0             |
| DMN            | L_STSva.R_47l  | -5.41781068452342    | NA                   | NA                      | 0             |

**Appendix 1** to Roy J-C, Desmidt T, Dam S, et al. Connectivity patterns of the core resting-state networks associated with apathy in late-life depression. *J Psychiatry Neurosci* 2023. Copyright © 2023 The Author(s) or their employer(s).

To receive this resource in an accessible format, please contact us at [cmajgroup@cmaj.ca](mailto:cmajgroup@cmaj.ca).

DOI: 10.1503/jpn.230008

*Online appendices are unedited and posted as supplied by the authors.*

|     |               |                   |                    |                    |   |
|-----|---------------|-------------------|--------------------|--------------------|---|
| DMN | L_31pd.R_PGs  | -2.89802463649345 | NA                 | NA                 | 0 |
| DMN | L_8Av.R_9a    | -5.49342231512277 | NA                 | NA                 | 0 |
| DMN | L_8Ad.R_31pd  | -3.26314924825906 | -0.899393803448064 | NA                 | 0 |
| DMN | L_10v.L_p32   | -3.01129135970476 | NA                 | NA                 | 0 |
| DMN | L_8Ad.R_31pv  | -2.34112049987339 | NA                 | -1.64203335963524  | 0 |
| DMN | L_9a.L_d32    | -0.29855983336457 | NA                 | NA                 | 0 |
| DMN | R_10d.R_EC    | -4.66439061629367 | NA                 | -4.8640632140927   | 0 |
| DMN | R_d23ab.R_H   | -3.01067266783902 | NA                 | NA                 | 0 |
| DMN | R_10d.R_STSvp | -5.41654648683144 | NA                 | NA                 | 0 |
| DMN | L_10v.R_POS1  | -2.3495353248658  | NA                 | NA                 | 0 |
| DMN | R_POS1.R_TGd  | -6.77388121985433 | NA                 | NA                 | 0 |
| DMN | L_PreS.R_10r  | -3.885724887865   | NA                 | -0.359346046207653 | 0 |
| DMN | L_31a.R_8Av   | -7.12267208195225 | NA                 | NA                 | 0 |
| DMN | L_10d.R_STSvp | -6.29675732378252 | NA                 | NA                 | 0 |
| DMN | L_9p.R_TE2a   | -4.39505476173305 | NA                 | NA                 | 0 |
| DMN | L_a24.R_9p    | -3.80721670464724 | NA                 | NA                 | 0 |

**Appendix 1** to Roy J-C, Desmidt T, Dam S, et al. Connectivity patterns of the core resting-state networks associated with apathy in late-life depression. *J Psychiatry Neurosci* 2023. Copyright © 2023 The Author(s) or their employer(s).

To receive this resource in an accessible format, please contact us at [cmajgroup@cmaj.ca](mailto:cmajgroup@cmaj.ca).

DOI: 10.1503/jpn.230008

*Online appendices are unedited and posted as supplied by the authors.*

|     |               |                   |                    |                   |   |
|-----|---------------|-------------------|--------------------|-------------------|---|
| DMN | L_p32.R_10v   | -4.39312546796959 | NA                 | NA                | 0 |
| DMN | L_47l.L_a24   | -4.70601928311307 | NA                 | NA                | 0 |
| DMN | L_PreS.L_TE1a | -4.16699226655492 | NA                 | -0.65983174252984 | 0 |
| DMN | L_EC.R_47m    | -4.392000259214   | -2.05139517148734  | NA                | 0 |
| DMN | L_8BL.R_8Av   | -1.13133640931629 | NA                 | NA                | 0 |
| DMN | R_TGd.R_v23ab | -4.49981391371763 | NA                 | NA                | 0 |
| DMN | L_47s.L_p32   | -3.06951729866767 | NA                 | NA                | 0 |
| DMN | L_p32.R_10r   | -1.54573080531646 | NA                 | NA                | 0 |
| DMN | L_23d.R_8Av   | -6.39933994904788 | -4.87141230669227  | NA                | 0 |
| DMN | L_9p.R_STSva  | -5.69642958394591 | NA                 | NA                | 0 |
| DMN | L_TE1m.R_47l  | -5.97802349477476 | NA                 | NA                | 0 |
| DMN | L_PGi.L_TE2a  | -3.4469247362535  | NA                 | NA                | 0 |
| DMN | L_25.R_p32    | -2.9828145472387  | -0.625220331885888 | NA                | 0 |
| DMN | L_PGs.L_TE2a  | -3.13776405141029 | NA                 | NA                | 0 |
| DMN | R_p32.R_PHA1  | -4.86246454645284 | NA                 | NA                | 0 |
| DMN | L_9m.L_d32    | 1.57085094282896  | NA                 | NA                | 0 |

**Appendix 1** to Roy J-C, Desmidt T, Dam S, et al. Connectivity patterns of the core resting-state networks associated with apathy in late-life depression. *J Psychiatry Neurosci* 2023. Copyright © 2023 The Author(s) or their employer(s).

To receive this resource in an accessible format, please contact us at [cmajgroup@cmaj.ca](mailto:cmajgroup@cmaj.ca).

DOI: 10.1503/jpn.230008

*Online appendices are unedited and posted as supplied by the authors.*

|     |               |                   |                   |                    |   |
|-----|---------------|-------------------|-------------------|--------------------|---|
| DMN | L_10pp.L_TE2a | -2.77052013634624 | NA                | NA                 | 0 |
| DMN | R_p32.R_s32   | -3.05231694252842 | NA                | NA                 | 0 |
| DMN | L_s32.L_TE1a  | -2.30200117420255 | NA                | 1.7411570194425    | 0 |
| DMN | L_10d.R_EC    | -5.38196370374481 | NA                | NA                 | 0 |
| DMN | L_47s.R_25    | -3.8020523836881  | NA                | NA                 | 0 |
| DMN | R_9p.R_STSvp  | -4.09153443255741 | -1.82811305252346 | NA                 | 0 |
| DMN | L_10d.L_H     | -5.29152867847983 | NA                | NA                 | 0 |
| DMN | L_10d.R_TGd   | -4.54024262234375 | NA                | NA                 | 0 |
| DMN | R_a24.R_TGd   | -5.35224430516694 | -3.2778171478251  | NA                 | 0 |
| DMN | R_10v.R_7m    | 0.260570228810167 | NA                | -0.198406627569319 | 0 |
| DMN | L_9p.R_9a     | -0.15569317728737 | NA                | NA                 | 0 |
| DMN | L_10d.R_PGi   | -4.0833685030496  | NA                | NA                 | 0 |
| DMN | R_10v.R_8Av   | -4.01974729455019 | NA                | -4.40351754005615  | 0 |
| DMN | L_31pd.R_TE1a | -3.64794318586708 | NA                | NA                 | 0 |
| DMN | L_10v.R_10d   | 0.52132198516065  | NA                | NA                 | 0 |
| DMN | L_10d.R_d32   | -3.420078100619   | NA                | NA                 | 0 |

**Appendix 1** to Roy J-C, Desmidt T, Dam S, et al. Connectivity patterns of the core resting-state networks associated with apathy in late-life depression. *J Psychiatry Neurosci* 2023. Copyright © 2023 The Author(s) or their employer(s).

To receive this resource in an accessible format, please contact us at [cmajgroup@cmaj.ca](mailto:cmajgroup@cmaj.ca).

DOI: 10.1503/jpn.230008

*Online appendices are unedited and posted as supplied by the authors.*

|     |               |                   |                   |                   |   |
|-----|---------------|-------------------|-------------------|-------------------|---|
| DMN | L_10d.L_10v   | -1.30726919243075 | NA                | NA                | 0 |
| DMN | L_v23ab.R_TGd | -4.02595470452967 | NA                | NA                | 0 |
| DMN | L_7m.R_TGd    | -3.47655657809244 | NA                | -2.63834545516295 | 0 |
| DMN | L_OFC.L_TE2a  | -2.46359743716246 | 0.370354916392149 | NA                | 0 |
| DMN | R_s32.R_TGd   | -4.92925957070645 | NA                | -5.20552076380919 | 0 |
| DMN | L_10v.R_p32   | -3.16662441198082 | NA                | NA                | 0 |
| DMN | L_PreS.R_8Ad  | -4.92321877864802 | NA                | NA                | 0 |
| DMN | L_10v.R_s32   | -0.39839681193691 | NA                | NA                | 0 |
| DMN | L_v23ab.R_EC  | -4.20014846720825 | NA                | -4.45549864608046 | 0 |
| DMN | L_8Ad.R_d32   | -3.97201632035192 | NA                | NA                | 0 |
| DMN | L_8Ad.R_9a    | -4.93620925714893 | NA                | -4.27952724561872 | 0 |
| DMN | R_8Av.R_8BL   | 2.39024074240691  | NA                | NA                | 0 |
| DMN | L_471.L_PreS  | -5.96877288219047 | -4.31503710012238 | NA                | 0 |
| DMN | R_10v.R_TE1a  | -0.43524814501567 | NA                | NA                | 0 |
| DMN | L_10d.R_H     | -6.01684816119542 | NA                | NA                | 0 |
| DMN | R_10r.R_s32   | 1.21269326505386  | NA                | NA                | 0 |



**Appendix 1** to Roy J-C, Desmidt T, Dam S, et al. Connectivity patterns of the core resting-state networks associated with apathy in late-life depression. *J Psychiatry Neurosci* 2023. Copyright © 2023 The Author(s) or their employer(s).

To receive this resource in an accessible format, please contact us at [cmajgroup@cmaj.ca](mailto:cmajgroup@cmaj.ca).

DOI: 10.1503/jpn.230008

*Online appendices are unedited and posted as supplied by the authors.*

|     |               |                   |    |                  |   |
|-----|---------------|-------------------|----|------------------|---|
| DMN | L_10d.R_TE1a  | -2.69912869710068 | NA | NA               | 0 |
| DMN | L_EC.R_POS1   | -2.39787521509814 | NA | NA               | 0 |
| DMN | L_47s.L_EC    | -4.31170238188549 | NA | NA               | 0 |
| DMN | L_10v.R_10r   | 1.68085632591856  | NA | NA               | 0 |
| DMN | L_47s.R_EC    | -5.41394293074303 | NA | NA               | 0 |
| DMN | L_10pp.L_47m  | -2.64391761960352 | NA | NA               | 0 |
| DMN | L_10v.R_a24   | -2.66528910983705 | NA | NA               | 0 |
| DMN | L_EC.R_PHA2   | -1.78197908944144 | NA | 2.20838795806594 | 0 |
| DMN | L_9p.L_PGi    | -4.06412217221126 | NA | NA               | 0 |
| DMN | R_10d.R_s32   | -2.20176812733064 | NA | NA               | 0 |
| DMN | R_10r.R_a24   | 0.986561187638412 | NA | NA               | 0 |
| DMN | L_a24.L_TGd   | -4.14447298193669 | NA | NA               | 0 |
| DMN | L_p32.R_10d   | -1.26151200653861 | NA | NA               | 0 |
| DMN | L_471.R_7m    | -5.42847650719122 | NA | NA               | 0 |
| DMN | L_STSvp.R_471 | -3.55528066564333 | NA | NA               | 0 |
| DMN | L_TE1m.R_TE1a | -1.63435814118937 | NA | NA               | 0 |

**Appendix 1** to Roy J-C, Desmidt T, Dam S, et al. Connectivity patterns of the core resting-state networks associated with apathy in late-life depression. *J Psychiatry Neurosci* 2023. Copyright © 2023 The Author(s) or their employer(s).

To receive this resource in an accessible format, please contact us at [cmajgroup@cmaj.ca](mailto:cmajgroup@cmaj.ca).

DOI: 10.1503/jpn.230008

*Online appendices are unedited and posted as supplied by the authors.*

|     |               |                   |                   |                   |   |
|-----|---------------|-------------------|-------------------|-------------------|---|
| DMN | L_10pp.R_31pv | -3.85212071047267 | NA                | NA                | 0 |
| DMN | L_25.L_47s    | -3.09672728117816 | NA                | NA                | 0 |
| DMN | L_p32.R_9p    | -4.46267408678453 | -1.94677344783226 | NA                | 0 |
| DMN | L_a24.L_TE2a  | -4.88823523147435 | NA                | NA                | 0 |
| DMN | R_d32.R_PreS  | -5.43108359057004 | NA                | -5.69233333645591 | 0 |
| DMN | R_31a.R_8Av   | -4.63164258909673 | -2.42959752242515 | NA                | 0 |
| DMN | R_10d.R_a24   | -0.15713703103179 | 2.7444113349927   | NA                | 0 |
| DMN | L_10d.L_9p    | -1.62328064351996 | NA                | NA                | 0 |
| DMN | L_471.R_23d   | -4.81212329775792 | NA                | NA                | 0 |
| DMN | L_471.R_a24   | -5.1836636038794  | NA                | NA                | 0 |
| DMN | R_9m.R_s32    | -3.22177574476761 | NA                | NA                | 0 |
| DMN | L_10pp.L_10r  | -3.33294304247003 | NA                | NA                | 0 |
| DMN | L_PGs.L_STSvp | -3.61443873584133 | NA                | 0.10639010299572  | 0 |
| DMN | L_TE1a.R_TE1a | 0.894603342996371 | NA                | NA                | 0 |
| DMN | L_d32.L_TE1m  | -2.59384498582837 | NA                | NA                | 0 |
| DMN | L_EC.R_9a     | -6.16618658105896 | NA                | NA                | 0 |

**Appendix 1** to Roy J-C, Desmidt T, Dam S, et al. Connectivity patterns of the core resting-state networks associated with apathy in late-life depression. *J Psychiatry Neurosci* 2023. Copyright © 2023 The Author(s) or their employer(s).

To receive this resource in an accessible format, please contact us at [cmajgroup@cmaj.ca](mailto:cmajgroup@cmaj.ca).

DOI: 10.1503/jpn.230008

*Online appendices are unedited and posted as supplied by the authors.*

|     |                |                   |                   |                   |   |
|-----|----------------|-------------------|-------------------|-------------------|---|
| DMN | L_STSva.L_TE2a | -3.2222959289083  | NA                | 0.509452981766002 | 0 |
| DMN | L_25.L_OFC     | -1.56266881406452 | NA                | NA                | 0 |
| DMN | L_OFC.R_31pv   | -3.88008004886221 | NA                | NA                | 0 |
| DMN | L_OFC.L_STSvp  | -3.85609239940048 | NA                | NA                | 0 |
| DMN | L_10pp.R_d32   | -4.22307534786217 | NA                | NA                | 0 |
| DMN | L_8Ad.L_PHA1   | -6.16613656016565 | NA                | NA                | 0 |
| DMN | L_10v.R_EC     | -3.1017411747456  | NA                | NA                | 0 |
| DMN | L_9a.R_p32     | -5.14580434649325 | NA                | NA                | 0 |
| DMN | L_STSvp.L_TE2a | -2.2782550496496  | NA                | NA                | 0 |
| DMN | R_10v.R_a24    | -3.21632717235238 | NA                | NA                | 0 |
| DMN | L_47l.L_EC     | -4.61843654161786 | NA                | NA                | 0 |
| DMN | L_a24.R_s32    | -3.54108455422621 | -1.16022171835426 | NA                | 0 |
| DMN | L_10v.R_31pv   | -0.36030197423021 | NA                | 0.357257666999326 | 0 |
| DMN | R_10r.R_H      | -3.94261906687243 | -1.73948608224426 | NA                | 0 |
| DMN | L_7m.L_TGd     | -1.77383710766966 | NA                | NA                | 0 |
| DMN | L_25.R_10r     | -0.86981912531534 | NA                | NA                | 0 |

**Appendix 1** to Roy J-C, Desmidt T, Dam S, et al. Connectivity patterns of the core resting-state networks associated with apathy in late-life depression. *J Psychiatry Neurosci* 2023. Copyright © 2023 The Author(s) or their employer(s).

To receive this resource in an accessible format, please contact us at [cmajgroup@cmaj.ca](mailto:cmajgroup@cmaj.ca).

DOI: 10.1503/jpn.230008

*Online appendices are unedited and posted as supplied by the authors.*

|     |                |                   |    |                   |   |
|-----|----------------|-------------------|----|-------------------|---|
| DMN | R_7m.R_TGd     | -2.94052472104574 | NA | NA                | 0 |
| DMN | L_31pd.R_STSvp | -5.03421007869041 | NA | NA                | 0 |
| DMN | L_H.R_PHA2     | -1.43090880834522 | NA | NA                | 0 |
| DMN | L_TE1m.R_8Av   | -5.63584161928211 | NA | NA                | 0 |
| DMN | R_9m.R_STSvp   | -2.6128054633855  | NA | NA                | 0 |
| DMN | L_STSvp.R_8Av  | -6.12171063516755 | NA | NA                | 0 |
| DMN | L_23d.L_d32    | -0.85911626397268 | NA | 0.071717998604833 | 0 |
| DMN | R_8Ad.R_STSvp  | -6.57580537094841 | NA | NA                | 0 |
| DMN | L_9p.R_STSvp   | -5.04080716995919 | NA | NA                | 0 |
| DMN | L_PHA1.R_8Av   | -7.2429764846049  | NA | NA                | 0 |
| DMN | L_STSvp.R_PHA1 | -6.00152816075528 | NA | -2.94036320416015 | 0 |
| DMN | R_H.R_s32      | -3.25503394357535 | NA | -3.58171459030549 | 0 |
| DMN | L_OFC.L_TE1m   | -2.44048376973196 | NA | NA                | 0 |
| DMN | R_9a.R_EC      | -6.5743777894806  | NA | -6.76789321595676 | 0 |
| DMN | L_s32.R_10d    | -2.95477314844244 | NA | NA                | 0 |
| DMN | L_p32.R_TGd    | -5.63816114837902 | NA | NA                | 0 |

**Appendix 1** to Roy J-C, Desmidt T, Dam S, et al. Connectivity patterns of the core resting-state networks associated with apathy in late-life depression. *J Psychiatry Neurosci* 2023. Copyright © 2023 The Author(s) or their employer(s).

To receive this resource in an accessible format, please contact us at [cmajgroup@cmaj.ca](mailto:cmajgroup@cmaj.ca).

DOI: 10.1503/jpn.230008

*Online appendices are unedited and posted as supplied by the authors.*

|     |                |                   |                   |                   |   |
|-----|----------------|-------------------|-------------------|-------------------|---|
| DMN | L_31pv.L_STSvp | -2.91420668318667 | NA                | -2.02152019979055 | 0 |
| DMN | L_PGi.R_TGd    | -6.01910620345987 | -4.37893655951403 | NA                | 0 |
| DMN | L_PGi.R_PGi    | -2.36003054887692 | NA                | NA                | 0 |
| DMN | L_47l.R_EC     | -5.48698574201617 | NA                | NA                | 0 |
| DMN | L_47m.R_10pp   | -3.50667451319376 | -1.18090704823785 | NA                | 0 |
| DMN | L_8BL.L_PGi    | -4.71480322983432 | NA                | NA                | 0 |
| DMN | L_H.R_47m      | -3.91334641880485 | NA                | NA                | 0 |
| DMN | L_8Av.R_8Av    | -0.81160271778129 | NA                | NA                | 0 |
| DMN | R_9p.R_TE2a    | -3.17353413774334 | NA                | NA                | 0 |
| DMN | L_TE1m.R_PGi   | -4.27513627750847 | NA                | NA                | 0 |
| DMN | L_31pd.R_47l   | -6.78176624872666 | NA                | NA                | 0 |
| DMN | L_25.R_s32     | -0.13203124709256 | NA                | 0.731207917176484 | 0 |
| DMN | L_31a.L_STSvp  | -3.20910705232596 | NA                | -2.34767735992826 | 0 |
| DMN | R_10d.R_H      | -4.76213856965678 | NA                | NA                | 0 |
| DMN | L_STSva.L_TGd  | NA                | 3.52408179743974  | NA                | 0 |
| DMN | L_v23ab.R_31a  | NA                | -1.42571457762353 | NA                | 0 |

**Appendix 1** to Roy J-C, Desmidt T, Dam S, et al. Connectivity patterns of the core resting-state networks associated with apathy in late-life depression. *J Psychiatry Neurosci* 2023. Copyright © 2023 The Author(s) or their employer(s).

To receive this resource in an accessible format, please contact us at [cmajgroup@cmaj.ca](mailto:cmajgroup@cmaj.ca).

DOI: 10.1503/jpn.230008

*Online appendices are unedited and posted as supplied by the authors.*

|     |                |    |                    |                   |   |
|-----|----------------|----|--------------------|-------------------|---|
| DMN | L_PGs.R_p32    | NA | -1.03446159066219  | NA                | 0 |
| DMN | L_PGi.R_p32    | NA | -2.79600861312439  | NA                | 0 |
| DMN | L_8Ad.R_PHA1   | NA | -5.26218847512138  | NA                | 0 |
| DMN | R_PHA2.R_STSva | NA | -1.06555419419622  | NA                | 0 |
| DMN | L_TGd.R_31pd   | NA | 0.860700730160926  | NA                | 0 |
| DMN | R_9p.R_p32     | NA | -0.616055273692027 | NA                | 0 |
| DMN | L_7m.L_PGs     | NA | 4.42672403438557   | 2.00820539995973  | 0 |
| DMN | R_PHA1.R_STSva | NA | -0.575283108080287 | NA                | 0 |
| DMN | R_8BL.R_PHA2   | NA | -4.86677630811345  | -6.70123277653991 | 0 |
| DMN | L_OFC.L_v23ab  | NA | -1.77667822111331  | NA                | 0 |
| DMN | L_d32.R_d32    | NA | 3.77834743705297   | 5.28595821934102  | 0 |
| DMN | L_PGs.R_7m     | NA | 0.598423006736202  | NA                | 0 |
| DMN | L_10r.L_8Av    | NA | -2.68420250054162  | NA                | 0 |
| DMN | L_PGs.R_s32    | NA | -2.53626051959496  | NA                | 0 |
| DMN | L_25.R_a24     | NA | -0.441699211142847 | NA                | 0 |
| DMN | L_10pp.L_POS1  | NA | -3.52708109039548  | NA                | 0 |

**Appendix 1** to Roy J-C, Desmidt T, Dam S, et al. Connectivity patterns of the core resting-state networks associated with apathy in late-life depression. *J Psychiatry Neurosci* 2023. Copyright © 2023 The Author(s) or their employer(s).

To receive this resource in an accessible format, please contact us at [cmajgroup@cmaj.ca](mailto:cmajgroup@cmaj.ca).

DOI: 10.1503/jpn.230008

*Online appendices are unedited and posted as supplied by the authors.*

|     |                |    |                    |                   |   |
|-----|----------------|----|--------------------|-------------------|---|
| DMN | R_31a.R_v23ab  | NA | 0.638220207683     | NA                | 0 |
| DMN | R_31a.R_7m     | NA | 0.185083147933187  | NA                | 0 |
| DMN | L_PreS.L_TE2a  | NA | -4.30339598581312  | -3.04236971304721 | 0 |
| DMN | L_31pv.R_PHA2  | NA | -0.472098881780156 | NA                | 0 |
| DMN | R_31pd.R_8Av   | NA | -1.25269957326958  | -3.76889063483837 | 0 |
| DMN | L_TE1m.R_TE2a  | NA | -0.452065453476917 | 0.861894983324418 | 0 |
| DMN | L_9m.L_EC      | NA | -1.34017390661651  | NA                | 0 |
| DMN | L_9m.L_OFC     | NA | 0.0790362052432161 | NA                | 0 |
| DMN | L_47s.L_TE1a   | NA | -0.569584392780288 | NA                | 0 |
| DMN | R_STSva.R_TE2a | NA | -2.22787431442264  | NA                | 0 |
| DMN | R_31a.R_POS1   | NA | 0.634323535547493  | -2.16378197494106 | 0 |
| DMN | L_PHA2.R_7m    | NA | -2.37162276530468  | NA                | 0 |
| DMN | R_47m.R_EC     | NA | -1.8261674130327   | -4.65865662882107 | 0 |
| DMN | L_31pv.R_8BL   | NA | -3.07611989580658  | NA                | 0 |
| DMN | L_8Av.L_9a     | NA | -0.140001679262775 | NA                | 0 |
| DMN | L_PHA2.L_POS1  | NA | 1.68517976408361   | NA                | 0 |

**Appendix 1** to Roy J-C, Desmidt T, Dam S, et al. Connectivity patterns of the core resting-state networks associated with apathy in late-life depression. *J Psychiatry Neurosci* 2023. Copyright © 2023 The Author(s) or their employer(s).

To receive this resource in an accessible format, please contact us at [cmajgroup@cmaj.ca](mailto:cmajgroup@cmaj.ca).

DOI: 10.1503/jpn.230008

*Online appendices are unedited and posted as supplied by the authors.*

|     |                |    |                    |                   |   |
|-----|----------------|----|--------------------|-------------------|---|
| DMN | R_7m.R_p32     | NA | 0.377336824017487  | NA                | 0 |
| DMN | L_a24.L_EC     | NA | -3.1562168828713   | NA                | 0 |
| DMN | L_8Ad.R_7m     | NA | -0.202257390620921 | -1.92342669957284 | 0 |
| DMN | L_PHA1.R_TE1a  | NA | -1.40130574599755  | NA                | 0 |
| DMN | R_a24.R_STSva  | NA | -4.67154037295742  | NA                | 0 |
| DMN | L_PGs.R_TE1a   | NA | -2.14464840220922  | NA                | 0 |
| DMN | L_31pd.R_31pv  | NA | 3.43511468456606   | NA                | 0 |
| DMN | R_7m.R_a24     | NA | -0.592476933373439 | NA                | 0 |
| DMN | L_47l.L_d23ab  | NA | -3.34988038526246  | NA                | 0 |
| DMN | R_9a.R_9p      | NA | 4.77491265356016   | NA                | 0 |
| DMN | L_31pv.L_47l   | NA | -3.27767126610309  | NA                | 0 |
| DMN | L_10pp.L_7m    | NA | -0.830456539477627 | NA                | 0 |
| DMN | L_d23ab.L_TE2a | NA | -0.299751203984819 | NA                | 0 |
| DMN | R_9a.R_p32     | NA | -1.13454341314706  | NA                | 0 |
| DMN | L_EC.L_TE1m    | NA | -0.48384090300982  | NA                | 0 |
| DMN | L_47s.L_9m     | NA | 0.89782654758606   | NA                | 0 |



**Appendix 1** to Roy J-C, Desmidt T, Dam S, et al. Connectivity patterns of the core resting-state networks associated with apathy in late-life depression. *J Psychiatry Neurosci* 2023. Copyright © 2023 The Author(s) or their employer(s).

To receive this resource in an accessible format, please contact us at [cmajgroup@cmaj.ca](mailto:cmajgroup@cmaj.ca).

DOI: 10.1503/jpn.230008

*Online appendices are unedited and posted as supplied by the authors.*

|     |                |    |                    |                    |   |
|-----|----------------|----|--------------------|--------------------|---|
| DMN | L_s32.R_47m    | NA | -1.59855720017549  | -0.368100944883878 | 0 |
| DMN | L_25.L_s32     | NA | 4.71565707350504   | NA                 | 0 |
| DMN | L_POS1.R_v23ab | NA | 5.6651463299163    | NA                 | 0 |
| DMN | R_8Ad.R_d32    | NA | 0.559870365374497  | NA                 | 0 |
| DMN | L_d32.L_PGi    | NA | -4.83290570257984  | NA                 | 0 |
| DMN | L_7m.L_PHA2    | NA | -1.69464227796663  | NA                 | 0 |
| DMN | L_TE2a.R_EC    | NA | -2.65625335517527  | NA                 | 0 |
| DMN | L_31pv.L_8BL   | NA | -1.90579261319658  | NA                 | 0 |
| DMN | R_8BL.R_9p     | NA | 6.9157032905575    | NA                 | 0 |
| DMN | R_8Av.R_PHA1   | NA | -6.28723752164449  | NA                 | 0 |
| DMN | L_9a.R_a24     | NA | -2.57612446570855  | NA                 | 0 |
| DMN | L_8Ad.L_9m     | NA | -0.407139320061892 | NA                 | 0 |
| DMN | R_d32.R_v23ab  | NA | -0.919646057280199 | NA                 | 0 |
| DMN | L_8Av.R_a24    | NA | -2.54783409068669  | NA                 | 0 |
| DMN | L_TE1m.R_EC    | NA | -2.18226204105156  | -1.28440537286983  | 0 |
| DMN | L_PreS.R_PreS  | NA | 2.9710729971349    | NA                 | 0 |

**Appendix 1** to Roy J-C, Desmidt T, Dam S, et al. Connectivity patterns of the core resting-state networks associated with apathy in late-life depression. *J Psychiatry Neurosci* 2023. Copyright © 2023 The Author(s) or their employer(s).

To receive this resource in an accessible format, please contact us at [cmajgroup@cmaj.ca](mailto:cmajgroup@cmaj.ca).

DOI: 10.1503/jpn.230008

*Online appendices are unedited and posted as supplied by the authors.*

|     |                |    |                    |                   |   |
|-----|----------------|----|--------------------|-------------------|---|
| DMN | L_TGd.R_10pp   | NA | -1.82092578118177  | NA                | 0 |
| DMN | L_31pv.R_10pp  | NA | -2.709169269476    | NA                | 0 |
| DMN | R_31pd.R_a24   | NA | -0.68682346937811  | NA                | 0 |
| DMN | R_9a.R_a24     | NA | -1.12860208031603  | NA                | 0 |
| DMN | R_31pv.R_8Av   | NA | 0.513509726634986  | -2.36804536513707 | 0 |
| DMN | R_8Ad.R_9a     | NA | 0.420498502071326  | NA                | 0 |
| DMN | L_47m.R_TGd    | NA | -1.49322013338685  | NA                | 0 |
| DMN | L_47s.R_8BL    | NA | -1.73566034799954  | NA                | 0 |
| DMN | L_31pd.R_OFC   | NA | -4.3682583890192   | NA                | 0 |
| DMN | L_8Av.R_10r    | NA | -4.12586736851966  | NA                | 0 |
| DMN | L_OFC.L_POS1   | NA | -3.68011517687921  | NA                | 0 |
| DMN | L_PHA2.R_v23ab | NA | -1.82626536454109  | NA                | 0 |
| DMN | R_31pd.R_8Ad   | NA | 0.409617211693508  | NA                | 0 |
| DMN | L_STSva.R_8BL  | NA | -2.87829519519515  | NA                | 0 |
| DMN | L_10d.R_PGs    | NA | -0.234817966287118 | NA                | 0 |
| DMN | R_9a.R_TE1a    | NA | 0.421175797301082  | NA                | 0 |

**Appendix 1** to Roy J-C, Desmidt T, Dam S, et al. Connectivity patterns of the core resting-state networks associated with apathy in late-life depression. *J Psychiatry Neurosci* 2023. Copyright © 2023 The Author(s) or their employer(s).

To receive this resource in an accessible format, please contact us at [cmajgroup@cmaj.ca](mailto:cmajgroup@cmaj.ca).

DOI: 10.1503/jpn.230008

*Online appendices are unedited and posted as supplied by the authors.*

|     |                |    |                    |                   |   |
|-----|----------------|----|--------------------|-------------------|---|
| DMN | R_9p.R_d32     | NA | 0.957083453288236  | NA                | 0 |
| DMN | R_7m.R_8Ad     | NA | 2.00612686511202   | NA                | 0 |
| DMN | R_47l.R_PreS   | NA | -3.00081602359216  | NA                | 0 |
| DMN | L_POS1.R_STSvp | NA | -6.75318838792411  | -6.02288657891724 | 0 |
| DMN | R_d32.R_s32    | NA | -3.37010545763365  | -5.6962387772648  | 0 |
| DMN | L_31pd.R_8BL   | NA | -3.90224375104217  | NA                | 0 |
| DMN | R_31pv.R_8Ad   | NA | 2.18365429008802   | NA                | 0 |
| DMN | R_OFC.R_POS1   | NA | -5.08966737367966  | NA                | 0 |
| DMN | L_9m.R_a24     | NA | 1.48341188936906   | NA                | 0 |
| DMN | R_47m.R_8BL    | NA | -1.27560403094346  | NA                | 0 |
| DMN | R_d32.R_p32    | NA | -0.653898079673551 | NA                | 0 |
| DMN | L_31pd.R_31pd  | NA | 5.2715341329675    | NA                | 0 |
| DMN | L_TE2a.R_s32   | NA | -2.56280220185509  | NA                | 0 |
| DMN | L_8Ad.R_TE2a   | NA | -2.55464340587324  | NA                | 0 |
| DMN | L_47l.R_47l    | NA | 2.21198997201542   | NA                | 0 |
| DMN | L_31pd.L_8BL   | NA | -1.3735546009079   | -2.56376462807847 | 0 |

**Appendix 1** to Roy J-C, Desmidt T, Dam S, et al. Connectivity patterns of the core resting-state networks associated with apathy in late-life depression. *J Psychiatry Neurosci* 2023. Copyright © 2023 The Author(s) or their employer(s).

To receive this resource in an accessible format, please contact us at [cmajgroup@cmaj.ca](mailto:cmajgroup@cmaj.ca).

DOI: 10.1503/jpn.230008

*Online appendices are unedited and posted as supplied by the authors.*

|     |              |    |                    |                   |   |
|-----|--------------|----|--------------------|-------------------|---|
| DMN | L_TE1a.L_TGd | NA | 6.97504405124111   | NA                | 0 |
| DMN | R_31pv.R_s32 | NA | 1.12235263042722   | -2.04730225948571 | 0 |
| DMN | L_9m.R_10v   | NA | 2.94032568514601   | NA                | 0 |
| DMN | L_47m.L_OFC  | NA | -0.518998105721412 | NA                | 0 |
| DMN | L_POS1.R_31a | NA | -1.0671341076894   | NA                | 0 |
| DMN | L_EC.R_9m    | NA | -2.74062941264936  | NA                | 0 |
| DMN | L_EC.R_23d   | NA | -3.08466755757383  | -1.72375548492618 | 0 |
| DMN | R_d32.R_PHA2 | NA | -3.88145759100461  | NA                | 0 |
| DMN | L_OFC.R_47s  | NA | -0.802703192214196 | NA                | 0 |
| DMN | R_d32.R_PGi  | NA | -1.15045257292097  | NA                | 0 |
| DMN | R_9a.R_s32   | NA | -3.0314634228189   | -5.12897720020026 | 0 |
| DMN | R_9p.R_a24   | NA | -0.733868139912377 | NA                | 0 |
| DMN | L_TE2a.R_10v | NA | -1.89871501008486  | NA                | 0 |
| DMN | L_TGd.R_8Av  | NA | -5.32863499611065  | NA                | 0 |
| DMN | L_PreS.R_s32 | NA | -1.89402002777494  | NA                | 0 |
| DMN | R_a24.R_d32  | NA | -0.292456492016571 | NA                | 0 |

**Appendix 1** to Roy J-C, Desmidt T, Dam S, et al. Connectivity patterns of the core resting-state networks associated with apathy in late-life depression. *J Psychiatry Neurosci* 2023. Copyright © 2023 The Author(s) or their employer(s).

To receive this resource in an accessible format, please contact us at [cmajgroup@cmaj.ca](mailto:cmajgroup@cmaj.ca).

DOI: 10.1503/jpn.230008

*Online appendices are unedited and posted as supplied by the authors.*

|     |               |    |                    |                   |   |
|-----|---------------|----|--------------------|-------------------|---|
| DMN | R_47m.R_TGd   | NA | -0.906572957697238 | NA                | 0 |
| DMN | L_PHA1.R_8BL  | NA | -4.17637703769073  | NA                | 0 |
| DMN | L_9m.L_TGd    | NA | 1.48931552461916   | NA                | 0 |
| DMN | L_PHA2.R_POS1 | NA | 0.977785379296041  | NA                | 0 |
| DMN | R_23d.R_a24   | NA | -0.423955010230622 | NA                | 0 |
| DMN | R_31a.R_PGs   | NA | 2.50518034750619   | NA                | 0 |
| DMN | L_PGs.R_10r   | NA | -1.64323574174547  | NA                | 0 |
| DMN | L_POS1.R_OFC  | NA | -5.28814497747735  | NA                | 0 |
| DMN | L_PHA2.R_TE2a | NA | -6.20234633296064  | NA                | 0 |
| DMN | L_PGs.L_TE1m  | NA | 2.55883613913438   | NA                | 0 |
| DMN | L_31pd.L_POS1 | NA | -0.135910714785771 | NA                | 0 |
| DMN | R_9m.R_a24    | NA | 1.16339051797151   | NA                | 0 |
| DMN | R_8Ad.R_a24   | NA | -0.323272645343505 | -3.06639642461209 | 0 |
| DMN | L_47l.R_47m   | NA | -3.36710556593061  | NA                | 0 |
| DMN | L_8Ad.L_8Av   | NA | 5.37682710765535   | 2.86463973436623  | 0 |
| DMN | L_d23ab.R_10d | NA | 0.0136377334578433 | 1.37548217916307  | 0 |

**Appendix 1** to Roy J-C, Desmidt T, Dam S, et al. Connectivity patterns of the core resting-state networks associated with apathy in late-life depression. *J Psychiatry Neurosci* 2023. Copyright © 2023 The Author(s) or their employer(s).

To receive this resource in an accessible format, please contact us at [cmajgroup@cmaj.ca](mailto:cmajgroup@cmaj.ca).

DOI: 10.1503/jpn.230008

*Online appendices are unedited and posted as supplied by the authors.*

|     |                |    |                   |                   |   |
|-----|----------------|----|-------------------|-------------------|---|
| DMN | L_7m.R_PHA2    | NA | -1.13927049015068 | NA                | 0 |
| DMN | R_d23ab.R_s32  | NA | NA                | -2.31194473452499 | 0 |
| DMN | L_10v.R_v23ab  | NA | NA                | 0.425200541146697 | 0 |
| DMN | L_471.L_PGs    | NA | NA                | -4.6325105861091  | 0 |
| DMN | L_PHA1.R_25    | NA | NA                | -0.66167501331085 | 0 |
| DMN | L_PGs.L_TGd    | NA | NA                | -1.02639986757158 | 0 |
| DMN | L_10v.R_7m     | NA | NA                | 0.684052358874007 | 0 |
| DMN | R_23d.R_H      | NA | NA                | -4.25910816723243 | 0 |
| DMN | L_10pp.R_H     | NA | NA                | -5.14435078588963 | 0 |
| DMN | L_STSva.L_TE1a | NA | NA                | 7.13448787149234  | 0 |
| DMN | R_7m.R_8Av     | NA | NA                | -3.51092569170573 | 0 |
| DMN | L_s32.R_TGd    | NA | NA                | -1.65504223834999 | 0 |
| DMN | L_v23ab.R_10v  | NA | NA                | 2.4304153935613   | 0 |
| DMN | L_31pv.L_9p    | NA | NA                | -3.68537239274893 | 0 |
| DMN | L_31a.L_TE2a   | NA | NA                | -2.96385452580935 | 0 |
| DMN | L_9p.R_PGs     | NA | NA                | -1.51151270930472 | 0 |

**Appendix 1** to Roy J-C, Desmidt T, Dam S, et al. Connectivity patterns of the core resting-state networks associated with apathy in late-life depression. *J Psychiatry Neurosci* 2023. Copyright © 2023 The Author(s) or their employer(s).

To receive this resource in an accessible format, please contact us at [cmajgroup@cmaj.ca](mailto:cmajgroup@cmaj.ca).

DOI: 10.1503/jpn.230008

*Online appendices are unedited and posted as supplied by the authors.*

|     |                |    |    |                    |   |
|-----|----------------|----|----|--------------------|---|
| DMN | R_7m.R_d32     | NA | NA | -3.02428599355842  | 0 |
| DMN | L_31pd.L_31pv  | NA | NA | 5.53129414495352   | 0 |
| DMN | L_8BL.R_31pv   | NA | NA | -0.765897422622891 | 0 |
| DMN | L_31a.R_PGs    | NA | NA | -2.00003429600711  | 0 |
| DMN | L_471.L_8Ad    | NA | NA | -5.47343493741299  | 0 |
| DMN | L_31a.L_471    | NA | NA | -5.09568417694716  | 0 |
| DMN | L_10v.R_31pd   | NA | NA | -0.325245641256422 | 0 |
| DMN | L_10pp.R_7m    | NA | NA | -2.88796444525251  | 0 |
| DMN | L_10pp.R_d23ab | NA | NA | -3.90790812524959  | 0 |
| DMN | L_a24.R_v23ab  | NA | NA | 1.33717693219287   | 0 |
| DMN | L_10d.R_8Ad    | NA | NA | -1.50585569357293  | 0 |
| DMN | L_25.R_10v     | NA | NA | -0.275407339294504 | 0 |
| DMN | R_8Av.R_TGd    | NA | NA | -4.51483253471582  | 0 |
| DMN | L_47m.L_p32    | NA | NA | -3.12073216006733  | 0 |
| DMN | L_8BL.L_PHA1   | NA | NA | -3.188757791934    | 0 |
| DMN | L_10v.L_v23ab  | NA | NA | 1.46190830419876   | 0 |

**Appendix 1** to Roy J-C, Desmidt T, Dam S, et al. Connectivity patterns of the core resting-state networks associated with apathy in late-life depression. *J Psychiatry Neurosci* 2023. Copyright © 2023 The Author(s) or their employer(s).

To receive this resource in an accessible format, please contact us at [cmajgroup@cmaj.ca](mailto:cmajgroup@cmaj.ca).

DOI: 10.1503/jpn.230008

*Online appendices are unedited and posted as supplied by the authors.*

|     |                |    |    |                    |   |
|-----|----------------|----|----|--------------------|---|
| DMN | L_471.R_31a    | NA | NA | -5.47567809712989  | 0 |
| DMN | R_25.R_PGs     | NA | NA | -2.51843504382388  | 0 |
| DMN | L_p32.R_47s    | NA | NA | -0.272980512788929 | 0 |
| DMN | L_8Av.L_d32    | NA | NA | -1.84146194044872  | 0 |
| DMN | L_10pp.R_PreS  | NA | NA | -4.56759745995818  | 0 |
| DMN | L_31pd.L_STSvp | NA | NA | -0.617186056631377 | 0 |
| DMN | L_a24.L_v23ab  | NA | NA | 1.32454862671064   | 0 |
| DMN | R_23d.R_PHA2   | NA | NA | -5.48699504632495  | 0 |
| DMN | L_10d.R_a24    | NA | NA | 0.553538498389725  | 0 |
| DMN | R_10pp.R_H     | NA | NA | -5.53933516931354  | 0 |
| DMN | L_10r.R_a24    | NA | NA | 1.28042976132325   | 0 |
| DMN | L_10v.R_d23ab  | NA | NA | -0.603934308938053 | 0 |
| DMN | L_31pv.R_PGs   | NA | NA | 0.729776406077422  | 0 |
| DMN | R_s32.R_TE2a   | NA | NA | -4.83416898550782  | 0 |
| DMN | L_8Ad.R_v23ab  | NA | NA | -1.33728074889727  | 0 |
| DMN | L_v23ab.R_8Ad  | NA | NA | NA                 | 0 |



**Appendix 1** to Roy J-C, Desmidt T, Dam S, et al. Connectivity patterns of the core resting-state networks associated with apathy in late-life depression. *J Psychiatry Neurosci* 2023. Copyright © 2023 The Author(s) or their employer(s).

To receive this resource in an accessible format, please contact us at [cmajgroup@cmaj.ca](mailto:cmajgroup@cmaj.ca).

DOI: 10.1503/jpn.230008

*Online appendices are unedited and posted as supplied by the authors.*

|     |                |    |    |                    |   |
|-----|----------------|----|----|--------------------|---|
| DMN | L_9p.L_PGs     | NA | NA | -1.29574603956694  | 0 |
| DMN | R_10v.R_OFC    | NA | NA | -0.767389484148815 | 0 |
| DMN | L_8Av.R_PreS   | NA | NA | -4.53676743952609  | 0 |
| DMN | L_8BL.R_PreS   | NA | NA | -2.73469645878403  | 0 |
| DMN | L_9p.L_d23ab   | NA | NA | -0.997932496691612 | 0 |
| DMN | L_EC.L_H       | NA | NA | 6.83422167906657   | 0 |
| DMN | L_7m.R_OFC     | NA | NA | -4.41415825162935  | 0 |
| DMN | L_POS1.L_STSva | NA | NA | -0.303614780951604 | 0 |
| DMN | L_7m.R_8Av     | NA | NA | -5.57203111074789  | 0 |
| DMN | L_23d.R_25     | NA | NA | -5.00301843341337  | 0 |
| DMN | R_31pv.R_7m    | NA | NA | 5.96420350609609   | 0 |
| DMN | L_8Av.L_TE1a   | NA | NA | -0.631606825780548 | 0 |
| DMN | L_23d.R_s32    | NA | NA | -5.54491984967177  | 0 |
| DMN | L_10d.L_10r    | NA | NA | 0.565553206784326  | 0 |
| DMN | L_v23ab.R_a24  | NA | NA | -2.88783771276924  | 0 |
| DMN | L_25.L_PGi     | NA | NA | -3.20478090253812  | 0 |

**Appendix 1** to Roy J-C, Desmidt T, Dam S, et al. Connectivity patterns of the core resting-state networks associated with apathy in late-life depression. *J Psychiatry Neurosci* 2023. Copyright © 2023 The Author(s) or their employer(s).

To receive this resource in an accessible format, please contact us at [cmajgroup@cmaj.ca](mailto:cmajgroup@cmaj.ca).

DOI: 10.1503/jpn.230008

*Online appendices are unedited and posted as supplied by the authors.*

|     |               |    |    |                    |   |
|-----|---------------|----|----|--------------------|---|
| DMN | L_PHA2.L_PreS | NA | NA | 1.47676040381304   | 0 |
| DMN | L_10v.R_H     | NA | NA | -2.72457328340185  | 0 |
| DMN | R_9p.R_PreS   | NA | NA | -4.8696768304881   | 0 |
| DMN | L_d32.L_p32   | NA | NA | 2.33720170421282   | 0 |
| DMN | L_10d.R_v23ab | NA | NA | -1.20956606072275  | 0 |
| DMN | L_8Ad.L_v23ab | NA | NA | -1.35018752257464  | 0 |
| DMN | R_31a.R_8BL   | NA | NA | -4.46006802608394  | 0 |
| DMN | R_8Av.R_s32   | NA | NA | -4.91670769093812  | 0 |
| DMN | L_10pp.R_OFC  | NA | NA | 0.0428196580862288 | 0 |
| DMN | R_8Av.R_TE1a  | NA | NA | -2.32302070216979  | 0 |
| DMN | R_31pd.R_9a   | NA | NA | -2.61247725371141  | 0 |
| DMN | R_10r.R_9p    | NA | NA | -2.14344189074424  | 0 |
| DMN | L_8BL.R_31a   | NA | NA | -1.15848113363424  | 0 |
| DMN | L_EC.R_10pp   | NA | NA | -0.964645785014979 | 0 |
| DMN | R_7m.R_9a     | NA | NA | -2.74689574768628  | 0 |
| DMN | L_H.R_7m      | NA | NA | 0.305258535319598  | 0 |

**Appendix 1** to Roy J-C, Desmidt T, Dam S, et al. Connectivity patterns of the core resting-state networks associated with apathy in late-life depression. *J Psychiatry Neurosci* 2023. Copyright © 2023 The Author(s) or their employer(s).

To receive this resource in an accessible format, please contact us at [cmajgroup@cmaj.ca](mailto:cmajgroup@cmaj.ca).

DOI: 10.1503/jpn.230008

*Online appendices are unedited and posted as supplied by the authors.*

|     |               |    |    |                    |   |
|-----|---------------|----|----|--------------------|---|
| DMN | R_31pd.R_s32  | NA | NA | -3.28705747234035  | 0 |
| DMN | L_TE2a.R_31a  | NA | NA | -2.56005833482812  | 0 |
| DMN | L_EC.L_PHA2   | NA | NA | 1.07363996864865   | 0 |
| DMN | L_d23ab.R_7m  | NA | NA | 4.60522235863745   | 0 |
| DMN | L_PGs.R_PreS  | NA | NA | 0.711990229975926  | 0 |
| DMN | R_23d.R_PHA1  | NA | NA | -5.41732117903671  | 0 |
| DMN | L_TGd.R_a24   | NA | NA | -2.12272045332442  | 0 |
| DMN | R_7m.R_s32    | NA | NA | -2.83482133880975  | 0 |
| DMN | L_POS1.R_23d  | NA | NA | -2.30467447247203  | 0 |
| DMN | R_9a.R_v23ab  | NA | NA | -4.20297469529356  | 0 |
| DMN | L_8BL.R_7m    | NA | NA | -0.515797985657576 | 0 |
| DMN | L_8Ad.L_8BL   | NA | NA | 2.30331209012524   | 0 |
| DMN | L_d23ab.R_8Av | NA | NA | -1.60721955329203  | 0 |
| DMN | L_PHA2.R_23d  | NA | NA | -3.31899738056532  | 0 |
| DMN | R_9a.R_d23ab  | NA | NA | -3.60012592988973  | 0 |
| DMN | R_10d.R_d32   | NA | NA | -0.905697271724643 | 0 |

**Appendix 1** to Roy J-C, Desmidt T, Dam S, et al. Connectivity patterns of the core resting-state networks associated with apathy in late-life depression. *J Psychiatry Neurosci* 2023. Copyright © 2023 The Author(s) or their employer(s).

To receive this resource in an accessible format, please contact us at [cmajgroup@cmaj.ca](mailto:cmajgroup@cmaj.ca).

DOI: 10.1503/jpn.230008

*Online appendices are unedited and posted as supplied by the authors.*

|     |                 |                    |                  |                   |   |
|-----|-----------------|--------------------|------------------|-------------------|---|
| DMN | L_v23ab.R_9a    | NA                 | NA               | -4.55315478180213 | 0 |
| DMN | R_31pv.R_9a     | NA                 | NA               | -2.65694894354516 | 0 |
| DMN | L_47s.L_PHA2    | NA                 | NA               | -4.52988369677519 | 0 |
| DMN | L_10d.L_v23ab   | NA                 | NA               | 0.546892966570164 | 0 |
| DMN | R_8Av.R_d23ab   | NA                 | NA               | -2.65776594987438 | 0 |
| DMN | R_10v.R_s32     | NA                 | NA               | -1.02001759715364 | 0 |
| CON | L_p24.L_PF      | 2.03873673703376   | 4.85438518945062 |                   | 1 |
| CON | L_PF.R_MI       | 2.84146150620993   | 5.45579337342869 |                   | 1 |
| CON | R_a24pr.R_a32pr | 6.83505649499147   | 9.96405726857474 |                   | 1 |
| CON | R_a32pr.R_PFop  | 0.151154521097793  | 2.84622217099082 |                   | 1 |
| CON | R_FOP5.R_PI     | 0.0247448372788317 | 2.76624481368041 |                   | 1 |
| CON | R_6r.R_p32pr    | 2.08848622955863   | 4.85940336018075 |                   | 1 |
| CON | L_23c.R_p24     | 0.567395640420133  | 3.13603397487006 |                   | 1 |
| CON | L_PF.R_p24      | 0.494201126362454  | 3.1783139942571  |                   | 1 |
| CON | R_a24pr.R_FOP3  | 2.04380657983145   | 4.80362940550681 |                   | 1 |
| CON | L_946d.R_MI     | 0.520797167794932  | 2.75495283732703 |                   | 1 |

**Appendix 1** to Roy J-C, Desmidt T, Dam S, et al. Connectivity patterns of the core resting-state networks associated with apathy in late-life depression. *J Psychiatry Neurosci* 2023. Copyright © 2023 The Author(s) or their employer(s).

To receive this resource in an accessible format, please contact us at [cmajgroup@cmaj.ca](mailto:cmajgroup@cmaj.ca).

DOI: 10.1503/jpn.230008

*Online appendices are unedited and posted as supplied by the authors.*

|     |                |                     |                  |  |   |
|-----|----------------|---------------------|------------------|--|---|
| CON | L_33pr.L_6ma   | 0.409471068337271   | 3.04453763256844 |  | 1 |
| CON | L_PFop.R_a32pr | -0.230898597265024  | 2.40909389225611 |  | 1 |
| CON | R_a24pr.R_FOP5 | 3.53789359198781    | 6.39110257650263 |  | 1 |
| CON | L_43.L_FOP5    | 2.907424332292      | 6.25183800951066 |  | 1 |
| CON | L_33pr.L_PF    | 3.19259328747827    | 6.19173351008777 |  | 1 |
| CON | L_a32pr.R_FOP3 | 0.843828714785872   | 3.64034815394076 |  | 1 |
| CON | R_5mv.R_p32pr  | 2.00345924913321    | NA               |  | 0 |
| CON | R_a32pr.R_FOP3 | 0.406305213801178   | NA               |  | 0 |
| CON | R_6ma.R_PFcm   | 0.174862487350881   | NA               |  | 0 |
| CON | L_23c.L_a24pr  | 3.77346905878377    | NA               |  | 0 |
| CON | L_23c.R_5mv    | 5.03260509838393    | NA               |  | 0 |
| CON | R_6ma.R_p24pr  | 0.900272373923133   | NA               |  | 0 |
| CON | L_43.R_p24     | -0.0352859605592809 | NA               |  | 0 |
| CON | L_23c.R_FOP4   | 2.05663378372261    | NA               |  | 0 |
| CON | R_46.R_FOP3    | 1.13617340828553    | NA               |  | 0 |
| CON | L_p24pr.R_946d | 0.804449429953329   | NA               |  | 0 |

**Appendix 1** to Roy J-C, Desmidt T, Dam S, et al. Connectivity patterns of the core resting-state networks associated with apathy in late-life depression. *J Psychiatry Neurosci* 2023. Copyright © 2023 The Author(s) or their employer(s).

To receive this resource in an accessible format, please contact us at [cmajgroup@cmaj.ca](mailto:cmajgroup@cmaj.ca).

DOI: 10.1503/jpn.230008

*Online appendices are unedited and posted as supplied by the authors.*

|     |                 |                   |    |  |   |
|-----|-----------------|-------------------|----|--|---|
| CON | L_PI.R_PoI2     | 1.66282905417036  | NA |  | 0 |
| CON | L_a24pr.L_p24pr | 6.16456666960042  | NA |  | 0 |
| CON | L_FOP1.R_p24    | 0.478828388106227 | NA |  | 0 |
| CON | L_46.R_p24pr    | 0.801890268699289 | NA |  | 0 |
| CON | R_6ma.R_p32pr   | 2.74256078208088  | NA |  | 0 |
| CON | R_MI.R_PoI1     | 4.71758579036451  | NA |  | 0 |
| CON | L_a24pr.L_FEF   | 0.480389512273757 | NA |  | 0 |
| CON | L_23c.R_PoI2    | 2.24399465819778  | NA |  | 0 |
| CON | L_PFcm.R_PFop   | 4.30318012447218  | NA |  | 0 |
| CON | R_a24pr.R_p24   | 5.3522617788518   | NA |  | 0 |
| CON | L_6r.R_PFop     | 2.44770159498179  | NA |  | 0 |
| CON | L_33pr.L_946d   | 1.97945708818743  | NA |  | 0 |
| CON | L_FEF.R_7Am     | 1.04239430772269  | NA |  | 0 |
| CON | L_p24pr.R_PI    | 1.22593806767259  | NA |  | 0 |
| CON | L_FOP3.R_PFcm   | 4.0046134041081   | NA |  | 0 |
| CON | L_a24pr.R_946d  | 2.99368628442998  | NA |  | 0 |

**Appendix 1** to Roy J-C, Desmidt T, Dam S, et al. Connectivity patterns of the core resting-state networks associated with apathy in late-life depression. *J Psychiatry Neurosci* 2023. Copyright © 2023 The Author(s) or their employer(s).

To receive this resource in an accessible format, please contact us at [cmajgroup@cmaj.ca](mailto:cmajgroup@cmaj.ca).

DOI: 10.1503/jpn.230008

*Online appendices are unedited and posted as supplied by the authors.*

|     |                |                    |    |  |   |
|-----|----------------|--------------------|----|--|---|
| CON | L_5mv.R_p24pr  | 3.58096544319889   | NA |  | 0 |
| CON | L_6ma.R_p24pr  | -0.141309507721515 | NA |  | 0 |
| CON | L_PFOp.R_PI    | 0.91838063404406   | NA |  | 0 |
| CON | L_5mv.R_p32pr  | 1.78267682610414   | NA |  | 0 |
| CON | L_7Am.R_PI     | -1.37438880046458  | NA |  | 0 |
| CON | L_5mv.R_PoI2   | 2.96237307777832   | NA |  | 0 |
| CON | L_46.L_PFCm    | -1.11160616515458  | NA |  | 0 |
| CON | R_43.R_46      | 0.810450002469112  | NA |  | 0 |
| CON | L_946d.L_a32pr | 5.50491827277477   | NA |  | 0 |
| CON | L_23c.R_FOP1   | 1.95086660662894   | NA |  | 0 |
| CON | R_46.R_a32pr   | 3.09258880448272   | NA |  | 0 |
| CON | L_5mv.R_PoI1   | 3.25952433378354   | NA |  | 0 |
| CON | L_23c.R_p32pr  | 1.41165143213058   | NA |  | 0 |
| CON | L_p24pr.R_PoI2 | 4.23538228761781   | NA |  | 0 |
| CON | L_23c.L_FOP1   | 2.10424484173383   | NA |  | 0 |
| CON | L_PI.R_46      | -0.407133736220873 | NA |  | 0 |

**Appendix 1** to Roy J-C, Desmidt T, Dam S, et al. Connectivity patterns of the core resting-state networks associated with apathy in late-life depression. *J Psychiatry Neurosci* 2023. Copyright © 2023 The Author(s) or their employer(s).

To receive this resource in an accessible format, please contact us at [cmajgroup@cmaj.ca](mailto:cmajgroup@cmaj.ca).

DOI: 10.1503/jpn.230008

*Online appendices are unedited and posted as supplied by the authors.*

|     |                 |                     |                  |  |   |
|-----|-----------------|---------------------|------------------|--|---|
| CON | L_a24pr.R_7Am   | -0.486502273438562  | NA               |  | 0 |
| CON | R_FOP3.R_p32pr  | 1.94694049646075    | NA               |  | 0 |
| CON | L_PF.R_FOP3     | 3.35052828274873    | NA               |  | 0 |
| CON | R_46.R_p24      | 2.65376093958039    | NA               |  | 0 |
| CON | R_5mv.R_a24pr   | 1.86670754574116    | NA               |  | 0 |
| CON | L_FOP3.R_FOP3   | 5.67345205253831    | NA               |  | 0 |
| CON | L_a32pr.L_p32pr | 4.51637966544446    | NA               |  | 0 |
| CON | L_6ma.R_SCEF    | 2.86767398436377    | NA               |  | 0 |
| CON | R_5mv.R_p24     | -0.0441002203430249 | NA               |  | 0 |
| CON | L_PoI2.R_46     | -0.648438928097675  | NA               |  | 0 |
| CON | L_PF.R_a32pr    | -1.0633000991545    | NA               |  | 0 |
| CON | L_5mv.R_PI      | 0.0989663215244913  | NA               |  | 0 |
| CON | L_5mv.R_p24     | -0.471056743238599  | NA               |  | 0 |
| CON | L_23c.R_MI      | 1.70083760590408    | NA               |  | 0 |
| CON | L_23c.L_33pr    | NA                  | 5.22899876732189 |  | 0 |
| CON | L_43.L_FOP4     | NA                  | 10.3650875715893 |  | 0 |



**Appendix 1** to Roy J-C, Desmidt T, Dam S, et al. Connectivity patterns of the core resting-state networks associated with apathy in late-life depression. *J Psychiatry Neurosci* 2023. Copyright © 2023 The Author(s) or their employer(s).

To receive this resource in an accessible format, please contact us at [cmajgroup@cmaj.ca](mailto:cmajgroup@cmaj.ca).

DOI: 10.1503/jpn.230008

*Online appendices are unedited and posted as supplied by the authors.*

|     |                 |    |                  |  |   |
|-----|-----------------|----|------------------|--|---|
| CON | L_46.R_FOP4     | NA | 1.56007318077147 |  | 0 |
| CON | L_a24pr.R_46    | NA | 6.21629065506233 |  | 0 |
| CON | L_a32pr.R_46    | NA | 5.96617029984771 |  | 0 |
| CON | R_6ma.R_7Am     | NA | 4.56400378138229 |  | 0 |
| CON | R_946d.R_PFop   | NA | 3.79255459200074 |  | 0 |
| CON | L_6ma.R_FOP3    | NA | 2.76290343814925 |  | 0 |
| CON | L_33pr.L_6r     | NA | 4.47333775401273 |  | 0 |
| CON | R_a24pr.R_PFop  | NA | 4.50883288559158 |  | 0 |
| CON | R_p32pr.R_PF    | NA | 4.21560011953827 |  | 0 |
| CON | L_23c.L_7Am     | NA | 6.23383481505764 |  | 0 |
| CON | L_PFop.R_46     | NA | 3.55739203735363 |  | 0 |
| CON | L_46.L_7Am      | NA | 2.42249388867514 |  | 0 |
| CON | L_PoI1.R_46     | NA | 3.5678028658617  |  | 0 |
| CON | R_946d.R_p24pr  | NA | 3.70596929755736 |  | 0 |
| CON | R_FEF.R_p32pr   | NA | 4.76315529893219 |  | 0 |
| CON | R_a32pr.R_p24pr | NA | 3.73706647442564 |  | 0 |

**Appendix 1** to Roy J-C, Desmidt T, Dam S, et al. Connectivity patterns of the core resting-state networks associated with apathy in late-life depression. *J Psychiatry Neurosci* 2023. Copyright © 2023 The Author(s) or their employer(s).

To receive this resource in an accessible format, please contact us at [cmajgroup@cmaj.ca](mailto:cmajgroup@cmaj.ca).

DOI: 10.1503/jpn.230008

*Online appendices are unedited and posted as supplied by the authors.*

|     |                 |    |                  |  |   |
|-----|-----------------|----|------------------|--|---|
| CON | L_43.R_a32pr    | NA | 1.89244841238975 |  | 0 |
| CON | R_946d.R_a32pr  | NA | 8.34396774524427 |  | 0 |
| CON | R_p24pr.R_p32pr | NA | 6.9284967716611  |  | 0 |
| CON | R_46.R_a24pr    | NA | 6.89373738850125 |  | 0 |
| CON | L_43.R_46       | NA | 2.34187330834419 |  | 0 |
| CON | L_23c.L_FOP3    | NA | 4.92916497029391 |  | 0 |
| CON | L_PFop.R_6ma    | NA | 3.00157290106641 |  | 0 |
| CON | L_PFop.R_946d   | NA | 4.49379478961213 |  | 0 |
| CON | L_7Am.R_PF      | NA | 1.73365669093694 |  | 0 |
| CON | L_46.R_MI       | NA | 2.336135436169   |  | 0 |
| CON | L_6r.R_p24      | NA | 2.84133226393714 |  | 0 |
| CON | L_946d.R_p24    | NA | 7.43315147892294 |  | 0 |
| CON | L_946d.R_a32pr  | NA | 5.65815183311023 |  | 0 |
| CON | L_p24.L_PFop    | NA | 5.11387663973596 |  | 0 |
| CON | L_p24.R_PF      | NA | 3.71113001908188 |  | 0 |
| CON | L_FOP3.R_a32pr  | NA | 3.52461053390871 |  | 0 |

**Appendix 1** to Roy J-C, Desmidt T, Dam S, et al. Connectivity patterns of the core resting-state networks associated with apathy in late-life depression. *J Psychiatry Neurosci* 2023. Copyright © 2023 The Author(s) or their employer(s).

To receive this resource in an accessible format, please contact us at [cmajgroup@cmaj.ca](mailto:cmajgroup@cmaj.ca).

DOI: 10.1503/jpn.230008

*Online appendices are unedited and posted as supplied by the authors.*

|     |                |    |                  |  |   |
|-----|----------------|----|------------------|--|---|
| CON | R_46.R_PFop    | NA | 4.24777615323344 |  | 0 |
| CON | R_p24.R_PFop   | NA | 4.39158385087507 |  | 0 |
| CON | L_946d.R_FOP4  | NA | 5.02367613537899 |  | 0 |
| CON | R_6r.R_a32pr   | NA | 3.21962314540229 |  | 0 |
| CON | L_6ma.L_PF     | NA | 3.87685786040353 |  | 0 |
| CON | L_PFop.R_p24   | NA | 3.99025986349006 |  | 0 |
| CON | L_46.R_7Am     | NA | 1.89991722749855 |  | 0 |
| CON | R_p24.R_PF     | NA | 2.76653972073799 |  | 0 |
| CON | R_43.R_p24     | NA | 2.69090718502726 |  | 0 |
| CON | L_FOP5.L_PFcM  | NA | 4.47402733626255 |  | 0 |
| CON | L_a24pr.R_6ma  | NA | 5.2948338334435  |  | 0 |
| CON | R_46.R_PI      | NA | 3.98512786660384 |  | 0 |
| CON | L_p24.R_PFop   | NA | 5.39215500345775 |  | 0 |
| CON | R_FOP1.R_PoI2  | NA | 8.43520645438037 |  | 0 |
| CON | R_946d.R_a24pr | NA | 7.03092900766951 |  | 0 |
| CON | L_FOP4.R_p24   | NA | 4.49600933774848 |  | 0 |

**Appendix 1** to Roy J-C, Desmidt T, Dam S, et al. Connectivity patterns of the core resting-state networks associated with apathy in late-life depression. *J Psychiatry Neurosci* 2023. Copyright © 2023 The Author(s) or their employer(s).

To receive this resource in an accessible format, please contact us at [cmajgroup@cmaj.ca](mailto:cmajgroup@cmaj.ca).

DOI: 10.1503/jpn.230008

*Online appendices are unedited and posted as supplied by the authors.*

|     |                 |                    |                  |                  |   |
|-----|-----------------|--------------------|------------------|------------------|---|
| CON | R_FOP1.R_p24    | NA                 | 1.8881494625486  |                  | 0 |
| CON | R_FEF.R_FOP4    | NA                 | 4.92072921076706 |                  | 0 |
| CON | R_FEF.R_SCEF    | NA                 | 7.82733598409615 |                  | 0 |
| CON | L_7Am.L_p24pr   | NA                 | 3.40830552783318 |                  | 0 |
| CON | R_46.R_FEF      | NA                 | 2.74477599102214 |                  | 0 |
| CON | L_a24pr.R_p24pr | NA                 | 9.04704301305782 |                  | 0 |
| FPN | L_IFJp.R_IP2    | 2.20867432521626   | 6.30291955677746 | 6.83851294196427 | 1 |
| FPN | L_PFm.R_a47r    | -1.57943663379676  | 2.13824220484535 | 2.72837707907194 | 1 |
| FPN | L_IFSa.R_s68    | 0.150187651050559  | 4.21316754260558 | 4.74930732643251 | 1 |
| FPN | R_a10p.R_p10p   | 6.70455953685539   | 10.6279259074413 | 11.5273177678159 | 1 |
| FPN | L_p47r.R_s68    | -1.2293446560806   | 2.77829544741801 | 3.33032869420186 | 1 |
| FPN | L_111.L_131     | 5.99172898667323   | NA               | NA               | 0 |
| FPN | R_a47r.R_p47r   | 6.96593279980765   | NA               | NA               | 0 |
| FPN | L_TE1p.R_111    | 0.0478335995724925 | NA               | NA               | 0 |
| FPN | L_a946v.R_POS2  | -1.8739776821079   | NA               | NA               | 0 |
| FPN | L_PFm.R_PFm     | 4.43925616492134   | NA               | NA               | 0 |

**Appendix 1** to Roy J-C, Desmidt T, Dam S, et al. Connectivity patterns of the core resting-state networks associated with apathy in late-life depression. *J Psychiatry Neurosci* 2023. Copyright © 2023 The Author(s) or their employer(s).

To receive this resource in an accessible format, please contact us at [cmajgroup@cmaj.ca](mailto:cmajgroup@cmaj.ca).

DOI: 10.1503/jpn.230008

*Online appendices are unedited and posted as supplied by the authors.*

|     |                |                     |                  |                  |   |
|-----|----------------|---------------------|------------------|------------------|---|
| FPN | L_POS2.R_p10p  | 0.198317444515647   | NA               | NA               | 0 |
| FPN | L_8BM.R_131    | -1.32591167174789   | 2.10325828972222 | NA               | 0 |
| FPN | L_i68.R_8BM    | -0.0828074025481539 | NA               | NA               | 0 |
| FPN | R_a10p.R_TE1p  | -0.29911456057338   | NA               | NA               | 0 |
| FPN | L_a47r.L_RSC   | -1.61851933956021   | NA               | NA               | 0 |
| FPN | L_p47r.R_POS2  | -2.44211638594324   | NA               | 1.97619690305132 | 0 |
| FPN | L_IP2.R_8BM    | -1.53836365308005   | NA               | NA               | 0 |
| FPN | L_a946v.L_s68  | 1.98852006554889    | NA               | NA               | 0 |
| FPN | L_IP2.R_PFM    | -1.39719852313241   | NA               | NA               | 0 |
| FPN | L_AVI.R_8C     | 2.21977927237866    | NA               | NA               | 0 |
| FPN | R_IFJp.R_s68   | 0.365956437064276   | NA               | 4.81744645090567 | 0 |
| FPN | L_p946v.R_a10p | -0.41682885701524   | NA               | 3.72259917473315 | 0 |
| FPN | L_IFSa.R_i68   | -0.255995667781283  | 3.78872372046283 | NA               | 0 |
| FPN | R_IP2.R_s68    | 0.60588797808797    | NA               | NA               | 0 |
| FPN | L_TE1p.R_a10p  | -1.99915808949674   | NA               | NA               | 0 |
| FPN | L_7Pm.L_s68    | 3.14795636217519    | NA               | NA               | 0 |

**Appendix 1** to Roy J-C, Desmidt T, Dam S, et al. Connectivity patterns of the core resting-state networks associated with apathy in late-life depression. *J Psychiatry Neurosci* 2023. Copyright © 2023 The Author(s) or their employer(s).

To receive this resource in an accessible format, please contact us at [cmajgroup@cmaj.ca](mailto:cmajgroup@cmaj.ca).

DOI: 10.1503/jpn.230008

*Online appendices are unedited and posted as supplied by the authors.*

|     |               |                    |                   |                  |   |
|-----|---------------|--------------------|-------------------|------------------|---|
| FPN | R_131.R_IP1   | 1.05288772978221   | NA                | NA               | 0 |
| FPN | L_a47r.R_i68  | 0.609009166047295  | NA                | NA               | 0 |
| FPN | L_131.R_TE1p  | 0.950518479655122  | 4.76138588804002  | NA               | 0 |
| FPN | R_8C.R_PFm    | 3.96136413961684   | NA                | NA               | 0 |
| FPN | L_i68.L_s68   | 7.81000483598545   | 11.7670592813385  | NA               | 0 |
| FPN | L_7Pm.R_111   | -2.64785954081147  | 0.811813525961701 | NA               | 0 |
| FPN | L_7Pm.L_i68   | 2.38779729346939   | NA                | 6.96219362830374 | 0 |
| FPN | L_AVI.R_p946v | 1.17674069916636   | NA                | NA               | 0 |
| FPN | L_a47r.R_s68  | -0.224227540508492 | 3.60069154026258  | NA               | 0 |
| FPN | L_PFm.R_p47r  | -2.70787382229719  | NA                | NA               | 0 |
| FPN | L_111.R_AVI   | -1.35296403634389  | NA                | NA               | 0 |
| FPN | L_PFm.R_TE1p  | 0.102629088349399  | NA                | NA               | 0 |
| FPN | L_p10p.R_TE1p | -2.25751397125318  | NA                | NA               | 0 |
| FPN | L_a47r.L_s68  | 0.57603741768041   | NA                | NA               | 0 |
| FPN | L_8BM.R_a47r  | 0.387852633329833  | NA                | NA               | 0 |
| FPN | L_8BM.R_s68   | 1.68961001885687   | 5.49822238541639  | NA               | 0 |

**Appendix 1** to Roy J-C, Desmidt T, Dam S, et al. Connectivity patterns of the core resting-state networks associated with apathy in late-life depression. *J Psychiatry Neurosci* 2023. Copyright © 2023 The Author(s) or their employer(s).

To receive this resource in an accessible format, please contact us at [cmajgroup@cmaj.ca](mailto:cmajgroup@cmaj.ca).

DOI: 10.1503/jpn.230008

*Online appendices are unedited and posted as supplied by the authors.*

|     |                |                     |                  |                  |   |
|-----|----------------|---------------------|------------------|------------------|---|
| FPN | L_TE1p.R_a47r  | -0.0817582721610546 | NA               | NA               | 0 |
| FPN | L_IFJp.L_p10p  | -1.53556193949842   | NA               | NA               | 0 |
| FPN | L_IFJp.R_p946v | -0.137732355674804  | NA               | 4.3239177085145  | 0 |
| FPN | R_IP1.R_s68    | 1.46723241279372    | NA               | NA               | 0 |
| FPN | L_TE1p.R_8C    | -0.486752789241054  | NA               | NA               | 0 |
| FPN | L_PFM.R_111    | -1.01854853710094   | NA               | NA               | 0 |
| FPN | R_a10p.R_RSC   | NA                  | 4.48550613277032 | NA               | 0 |
| FPN | R_131.R_a47r   | NA                  | 6.93918980767228 | NA               | 0 |
| FPN | R_111.R_a47r   | NA                  | 8.48367381535614 | NA               | 0 |
| FPN | L_IFSa.R_IP1   | NA                  | 3.56784053642227 | 3.91066218797233 | 0 |
| FPN | L_p10p.R_s68   | NA                  | 4.99588011254824 | NA               | 0 |
| FPN | L_a946v.R_s68  | NA                  | 4.39952854753342 | NA               | 0 |
| FPN | L_a10p.R_s68   | NA                  | 3.611835678116   | NA               | 0 |
| FPN | L_TE1p.R_IP2   | NA                  | 5.79341257830071 | NA               | 0 |
| FPN | L_i68.R_s68    | NA                  | 8.29847361443632 | NA               | 0 |
| FPN | L_7Pm.R_7Pm    | NA                  | 13.5473535326311 | NA               | 0 |

**Appendix 1** to Roy J-C, Desmidt T, Dam S, et al. Connectivity patterns of the core resting-state networks associated with apathy in late-life depression. *J Psychiatry Neurosci* 2023. Copyright © 2023 The Author(s) or their employer(s).

To receive this resource in an accessible format, please contact us at [cmajgroup@cmaj.ca](mailto:cmajgroup@cmaj.ca).

DOI: 10.1503/jpn.230008

*Online appendices are unedited and posted as supplied by the authors.*

|     |               |    |                  |                  |   |
|-----|---------------|----|------------------|------------------|---|
| FPN | L_8C.R_IP2    | NA | 5.83155701534688 | 6.76838224996292 | 0 |
| FPN | L_p47r.R_TE1p | NA | 3.47476840485881 | NA               | 0 |
| FPN | R_111.R_RSC   | NA | 2.3573329967476  | NA               | 0 |
| FPN | L_AVI.R_IP1   | NA | 3.35620614239664 | NA               | 0 |
| FPN | R_131.R_IFJp  | NA | 6.16540850963446 | NA               | 0 |
| FPN | L_p47r.R_p47r | NA | 8.14696049457939 | NA               | 0 |
| FPN | L_i68.R_7Pm   | NA | 3.93003184200411 | 4.70302297450225 | 0 |
| FPN | L_IP1.L_PFm   | NA | 5.50642738391302 | NA               | 0 |
| FPN | L_a10p.R_RSC  | NA | 2.80995028348612 | NA               | 0 |
| FPN | R_i68.R_p946v | NA | 5.28708190637514 | NA               | 0 |
| FPN | L_a10p.L_s68  | NA | 4.45315250073318 | NA               | 0 |
| FPN | L_i68.L_IFSa  | NA | 7.5405039321992  | NA               | 0 |
| FPN | L_7Pm.R_IP1   | NA | 4.96918255937304 | 5.46729276917345 | 0 |
| FPN | L_p10p.R_131  | NA | 1.63071670804844 | NA               | 0 |
| FPN | R_a47r.R_s68  | NA | 7.11061869633917 | NA               | 0 |
| FPN | L_IP1.R_IP2   | NA | 8.53760540022713 | NA               | 0 |



**Appendix 1** to Roy J-C, Desmidt T, Dam S, et al. Connectivity patterns of the core resting-state networks associated with apathy in late-life depression. *J Psychiatry Neurosci* 2023. Copyright © 2023 The Author(s) or their employer(s).

To receive this resource in an accessible format, please contact us at [cmajgroup@cmaj.ca](mailto:cmajgroup@cmaj.ca).

DOI: 10.1503/jpn.230008

*Online appendices are unedited and posted as supplied by the authors.*

|     |                |    |                   |                  |   |
|-----|----------------|----|-------------------|------------------|---|
| FPN | L_131.R_IP2    | NA | 3.83039014111335  | NA               | 0 |
| FPN | L_POS2.R_a946v | NA | 3.07807633918253  | NA               | 0 |
| FPN | L_a47r.R_p47r  | NA | 6.82864677630205  | 7.39578126025241 | 0 |
| FPN | L_POS2.R_p47r  | NA | 1.00985294496187  | NA               | 0 |
| FPN | L_131.L_TE1p   | NA | 6.60064551431416  | NA               | 0 |
| FPN | L_8C.R_a10p    | NA | 4.13538062265309  | 4.82411617853997 | 0 |
| FPN | L_p946v.R_IP2  | NA | 6.28523852356659  | 7.23865796468342 | 0 |
| FPN | L_IFSa.R_7Pm   | NA | 0.904603020730623 | 1.30226883818962 | 0 |
| FPN | L_p47r.R_RSC   | NA | 1.46378006823071  | NA               | 0 |
| FPN | L_p10p.L_s68   | NA | 7.86816982123474  | NA               | 0 |
| FPN | L_i68.L_p47r   | NA | NA                | 7.28383182666547 | 0 |
| FPN | L_a946v.R_a10p | NA | NA                | 4.07839813541172 | 0 |
| FPN | R_IFSa.R_s68   | NA | NA                | 5.70897274500998 | 0 |
| FPN | L_p47r.R_111   | NA | NA                | 5.10366884032307 | 0 |
| FPN | R_a47r.R_PFm   | NA | NA                | 9.23536971132976 | 0 |
| FPN | L_IFSa.R_a946v | NA | NA                | 5.2293781199338  | 0 |

**Appendix 1** to Roy J-C, Desmidt T, Dam S, et al. Connectivity patterns of the core resting-state networks associated with apathy in late-life depression. *J Psychiatry Neurosci* 2023. Copyright © 2023 The Author(s) or their employer(s).

To receive this resource in an accessible format, please contact us at [cmajgroup@cmaj.ca](mailto:cmajgroup@cmaj.ca).

DOI: 10.1503/jpn.230008

*Online appendices are unedited and posted as supplied by the authors.*

|     |               |    |    |                   |   |
|-----|---------------|----|----|-------------------|---|
| FPN | L_POS2.R_111  | NA | NA | 2.92841005929712  | 0 |
| FPN | R_111.R_POS2  | NA | NA | 4.41116583131065  | 0 |
| FPN | L_p47r.L_s68  | NA | NA | 4.41606746932947  | 0 |
| FPN | L_IFJp.R_111  | NA | NA | 3.93421753414702  | 0 |
| FPN | L_111.L_p946v | NA | NA | 9.6643755455747   | 0 |
| FPN | L_IFJp.R_8BM  | NA | NA | 3.4997703855336   | 0 |
| FPN | L_i68.R_PFm   | NA | NA | 3.30914687926837  | 0 |
| FPN | R_AVI.R_s68   | NA | NA | 4.90498655344756  | 0 |
| FPN | L_IFSa.R_RSC  | NA | NA | 2.47854695808793  | 0 |
| FPN | L_p47r.R_7Pm  | NA | NA | 0.792431715112975 | 0 |
| FPN | R_p946v.R_RSC | NA | NA | 1.51593808205053  | 0 |
| FPN | R_7Pm.R_IP1   | NA | NA | 6.79507620162726  | 0 |
| FPN | L_a47r.R_7Pm  | NA | NA | 2.43188785486572  | 0 |
| FPN | L_7Pm.R_IP2   | NA | NA | 4.63186893029109  | 0 |
| FPN | R_a10p.R_a47r | NA | NA | 9.95451554745035  | 0 |
| FPN | L_8C.R_s68    | NA | NA | 3.9120183110975   | 0 |

**Appendix 1** to Roy J-C, Desmidt T, Dam S, et al. Connectivity patterns of the core resting-state networks associated with apathy in late-life depression. *J Psychiatry Neurosci* 2023. Copyright © 2023 The Author(s) or their employer(s).

To receive this resource in an accessible format, please contact us at [cmajgroup@cmaj.ca](mailto:cmajgroup@cmaj.ca).

DOI: 10.1503/jpn.230008

*Online appendices are unedited and posted as supplied by the authors.*

|     |                |                   |                   |                   |   |
|-----|----------------|-------------------|-------------------|-------------------|---|
| FPN | L_s68.R_8C     | NA                | NA                | 4.2315492838997   | 0 |
| FPN | R_p47r.R_s68   | NA                | NA                | 7.3708974219176   | 0 |
| FPN | L_p47r.L_RSC   | NA                | NA                | 2.51781768511677  | 0 |
| FPN | L_7Pm.L_p47r   | NA                | NA                | 3.1014182927058   | 0 |
| FPN | L_IFJp.R_s68   | NA                | NA                | 2.96213188110461  | 0 |
| FPN | L_7Pm.R_IFSa   | NA                | NA                | 0.206045539854026 | 0 |
| FPN | L_a47r.R_p946v | NA                | NA                | 6.88739295050551  | 0 |
| GOB | R_10d.R_a24    | -1.44676980033711 | 3.10831038881584  |                   | 1 |
| GOB | L_9m.L_a24pr   | -4.87454105870723 | -1.14011699424175 |                   | 1 |
| GOB | L_p24.R_s32    | -6.27461214552417 | -2.81063929204922 |                   | 1 |
| GOB | L_25.R_p32     | -3.66080381181566 | 0.270864079797339 |                   | 1 |
| GOB | L_a24pr.R_d32  | -2.91739174505174 | 1.4847384667437   |                   | 1 |
| GOB | R_a24.R_s32    | -3.10537110981179 | 1.08561606429484  |                   | 1 |
| GOB | L_p24pr.R_10v  | -5.98904242747586 | -2.47936980148259 |                   | 1 |
| GOB | L_10v.R_a24    | -3.41200963276137 | NA                |                   | 0 |
| GOB | L_25.R_s32     | -1.42709839084063 | NA                |                   | 0 |

**Appendix 1** to Roy J-C, Desmidt T, Dam S, et al. Connectivity patterns of the core resting-state networks associated with apathy in late-life depression. *J Psychiatry Neurosci* 2023. Copyright © 2023 The Author(s) or their employer(s).

To receive this resource in an accessible format, please contact us at [cmajgroup@cmaj.ca](mailto:cmajgroup@cmaj.ca).

DOI: 10.1503/jpn.230008

*Online appendices are unedited and posted as supplied by the authors.*

|     |               |                    |    |  |   |
|-----|---------------|--------------------|----|--|---|
| GOB | L_p32.R_10d   | -2.31209280452767  | NA |  | 0 |
| GOB | L_25.R_10r    | -2.00518539697379  | NA |  | 0 |
| GOB | R_d32.R_p32pr | -3.88835863081902  | NA |  | 0 |
| GOB | L_10d.L_10v   | -2.34794543288093  | NA |  | 0 |
| GOB | L_10d.L_25    | -3.9688225645232   | NA |  | 0 |
| GOB | R_10v.R_a24   | -3.84377051312747  | NA |  | 0 |
| GOB | L_10v.R_10d   | -0.915169386408506 | NA |  | 0 |
| GOB | L_10d.R_d32   | -4.00341770657584  | NA |  | 0 |
| GOB | R_p32.R_s32   | -3.71526178381284  | NA |  | 0 |
| GOB | L_10v.R_p32   | -3.80482636564572  | NA |  | 0 |
| GOB | L_p32.R_10v   | -4.76584015348897  | NA |  | 0 |
| GOB | L_10v.R_s32   | -1.63580671536442  | NA |  | 0 |
| GOB | L_24dv.R_10v  | -5.83415663240509  | NA |  | 0 |
| GOB | L_p32.R_10r   | -2.53478986871369  | NA |  | 0 |
| GOB | R_10r.R_a24   | -0.550635425313885 | NA |  | 0 |
| GOB | L_10pp.R_d32  | -4.63259892287634  | NA |  | 0 |

**Appendix 1** to Roy J-C, Desmidt T, Dam S, et al. Connectivity patterns of the core resting-state networks associated with apathy in late-life depression. *J Psychiatry Neurosci* 2023. Copyright © 2023 The Author(s) or their employer(s).

To receive this resource in an accessible format, please contact us at [cmajgroup@cmaj.ca](mailto:cmajgroup@cmaj.ca).

DOI: 10.1503/jpn.230008

*Online appendices are unedited and posted as supplied by the authors.*

|     |                |                     |                   |  |   |
|-----|----------------|---------------------|-------------------|--|---|
| GOB | R_10d.R_p32pr  | -5.75686202741962   | NA                |  | 0 |
| GOB | L_9m.L_d32     | -0.0928204824796145 | NA                |  | 0 |
| GOB | L_10v.R_10r    | -0.0066267614307086 | NA                |  | 0 |
| GOB | R_9m.R_p32pr   | -5.13698364111737   | NA                |  | 0 |
| GOB | L_24dd.L_a24pr | -3.047160973907283  | NA                |  | 0 |
| GOB | L_10v.L_p32    | -3.683116560166     | NA                |  | 0 |
| GOB | R_10d.R_s32    | -3.04882196735475   | NA                |  | 0 |
| GOB | R_a32pr.R_s32  | NA                  | -2.38528201771417 |  | 0 |
| GOB | L_10pp.L_pOFC  | NA                  | 0.888668105980399 |  | 0 |
| GOB | R_10pp.R_p24pr | NA                  | -1.66569960867415 |  | 0 |
| GOB | R_a32pr.R_p32  | NA                  | 0.383714995397212 |  | 0 |
| GOB | L_25.R_24dv    | NA                  | -4.04672480181972 |  | 0 |
| GOB | R_10pp.R_pOFC  | NA                  | 0.827749962315972 |  | 0 |
| GOB | L_d32.R_a32pr  | NA                  | 4.32236810311955  |  | 0 |
| GOB | L_p32pr.R_24dd | NA                  | 2.59670719599868  |  | 0 |
| GOB | R_a24.R_p24    | NA                  | 3.70938129874718  |  | 0 |

**Appendix 1** to Roy J-C, Desmidt T, Dam S, et al. Connectivity patterns of the core resting-state networks associated with apathy in late-life depression. *J Psychiatry Neurosci* 2023. Copyright © 2023 The Author(s) or their employer(s).

To receive this resource in an accessible format, please contact us at [cmajgroup@cmaj.ca](mailto:cmajgroup@cmaj.ca).

DOI: 10.1503/jpn.230008

*Online appendices are unedited and posted as supplied by the authors.*

|     |                 |    |                   |  |   |
|-----|-----------------|----|-------------------|--|---|
| GOB | R_a24pr.R_d32   | NA | 3.2255060403678   |  | 0 |
| GOB | R_a32pr.R_p24pr | NA | -0.51280464877512 |  | 0 |
| GOB | L_a32pr.R_d32   | NA | 3.2758740399137   |  | 0 |
| GOB | R_p24.R_s32     | NA | -1.69452550930791 |  | 0 |
| GOB | R_9m.R_a24      | NA | 1.77698930531778  |  | 0 |
| GOB | L_9m.R_a24      | NA | 2.04646785634296  |  | 0 |
| GOB | L_10v.R_pOFC    | NA | 1.15195719436362  |  | 0 |
| GOB | L_a24pr.L_d32   | NA | 2.54642023937465  |  | 0 |
| GOB | R_a24.R_d32     | NA | 0.551072607777688 |  | 0 |
| GOB | R_24dv.R_p24    | NA | -1.75300581084209 |  | 0 |
| GOB | R_24dv.R_9m     | NA | -3.20186508692621 |  | 0 |
| GOB | R_d32.R_s32     | NA | -2.04050551151099 |  | 0 |
| GOB | L_10pp.L_24dd   | NA | -2.58584363657064 |  | 0 |
| GOB | L_10pp.L_p24pr  | NA | -2.50326606950547 |  | 0 |
| GOB | L_a24pr.R_p24pr | NA | 4.40421440048269  |  | 0 |
| GOB | L_a24.R_s32     | NA | -0.17964145298116 |  | 0 |

**Appendix 1** to Roy J-C, Desmidt T, Dam S, et al. Connectivity patterns of the core resting-state networks associated with apathy in late-life depression. *J Psychiatry Neurosci* 2023. Copyright © 2023 The Author(s) or their employer(s).

To receive this resource in an accessible format, please contact us at [cmajgroup@cmaj.ca](mailto:cmajgroup@cmaj.ca).

DOI: 10.1503/jpn.230008

*Online appendices are unedited and posted as supplied by the authors.*

|     |                |    |                   |  |   |
|-----|----------------|----|-------------------|--|---|
| GOB | L_p24pr.R_10pp | NA | -2.41427639322638 |  | 0 |
| GOB | R_9m.R_p24pr   | NA | -0.78381906464378 |  | 0 |
| GOB | L_p32pr.R_9m   | NA | -2.8884461894497  |  | 0 |

We report the detailed inter-region connectivity of the subnetworks significantly associated with each apathy scale. The effect size of the association between the inter-region correlations and the apathy scales are presented only for interpretation purposes (t-values). When pairs of regions were common to all the significant scales of apathy, they were deemed robust regions associated with apathy and are reported in the main results (value of the column *join* equals to 1).

**AES:** Apathy Evaluation Scale; t-value **AMI:** Apathy Motivation Index; **Apathy:** Diagnostic criteria of apathy; **Robust:** ROI-to-ROI correlations found across all significant subnetworks for each network (1 = True, 0 = False); **ROI-to-ROI:** Pairs of regions of interest.

**Appendix 1** to Roy J-C, Desmidt T, Dam S, et al. Connectivity patterns of the core resting-state networks associated with apathy in late-life depression. *J Psychiatry Neurosci* 2023. Copyright © 2023 The Author(s) or their employer(s).

To receive this resource in an accessible format, please contact us at [cmajgroup@cmaj.ca](mailto:cmajgroup@cmaj.ca).

DOI: 10.1503/jpn.230008

*Online appendices are unedited and posted as supplied by the authors.*

**Table S3: Proportion of shared and different components identified by TFNBS between apathy scale**

| <b>RSN</b> | <b>Comparison</b> | <b>Percentage of shared regions</b> | <b>Percentage of different regions</b> | <b>Percentage of shared direction of the effect</b> | <b>Percentage of different direction of the effect</b> |
|------------|-------------------|-------------------------------------|----------------------------------------|-----------------------------------------------------|--------------------------------------------------------|
| DMN        | AES-AMI           | 6.35                                | 93.64                                  | 44.19                                               | 55.81                                                  |
|            | AES-DCA           | 9.06                                | 90.93                                  | 53.38                                               | 46.61                                                  |
|            | AMI-DCA           | 7.84                                | 92.15                                  | 49.22                                               | 50.78                                                  |
|            | <b>Total</b>      | 1.85                                | 98.15                                  | 15.62                                               | 84.38                                                  |
| FPN        | AES-AMI           | 11.88                               | 88.12                                  | 44.87                                               | 55.13                                                  |
|            | AES-DCA           | 9.71                                | 90.29                                  | 41.25                                               | 58.75                                                  |
|            | AMI-DCA           | 13                                  | 87                                     | 63.77                                               | 36.23                                                  |
|            | <b>Total</b>      | 4.63                                | 95.37                                  | 16.49                                               | 83.5                                                   |
| CON        | AES-AMI           | 14.28                               | 85.71                                  | 13.27                                               | 86.7                                                   |

For each resting-state network intranetwork connectivity, we report the proportion of shared regions detected by TFNBS and the proportion of shared direction of the association between each apathy scale combination taken two-by-two and all together. **AES**: Apathy Evaluation Scale; **AMI**: Apathy Motivation Index; **DCA**: Diagnostic criteria of apathy; **RSN**: Resting-state Network.



**Appendix 1** to Roy J-C, Desmidt T, Dam S, et al. Connectivity patterns of the core resting-state networks associated with apathy in late-life depression. *J Psychiatry Neurosci* 2023. Copyright © 2023 The Author(s) or their employer(s).

To receive this resource in an accessible format, please contact us at [cmajgroup@cmaj.ca](mailto:cmajgroup@cmaj.ca).

DOI: 10.1503/jpn.230008

*Online appendices are unedited and posted as supplied by the authors.*

**Table S4: Proportion of shared components identified by TFNBS with and without modified MADRS as covariate**

| <b>RSN</b> | <b>Scale</b> | <b>Percentage of shared regions</b> | <b>Percentage of similar effect</b> |
|------------|--------------|-------------------------------------|-------------------------------------|
| DMN        | AES          | 99.22                               | 99.19                               |
|            | AMI          | 99.03                               | 98.93                               |
|            | DCA          | 98.79                               | 97.01                               |
| FPN        | AES          | 99.58                               | 99.15                               |
|            | AMI          | 99.15                               | 99.15                               |
|            | DCA          | 98.52                               | 97.56                               |
| CON        | AES          | 99.44                               | 99.37                               |
|            | AMI          | 99.16                               | 99.16                               |

For each resting-state network intranetwork connectivity, we report the proportion of shared regions detected by TFNBS and the proportion of shared direction of the association between the results with the MADRS as covariate and without the MADRS as a covariate. **AES**: Apathy Evaluation Scale; **AMI**: Apathy Motivation Index; **DCA**: Diagnostic criteria of apathy; **RSN**: Resting-state Network.

## Figures

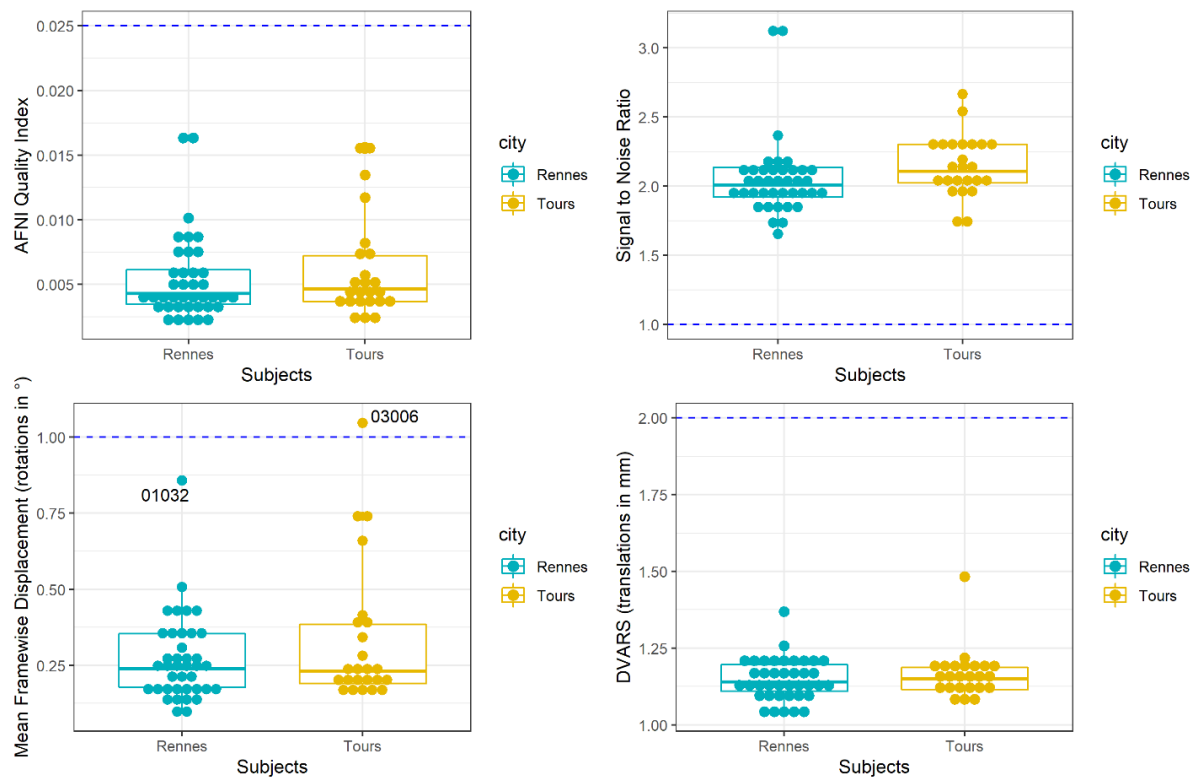

**Fig S1. Quality control of fMRI data**

Quality control results are summarized in Figure S1. Overall, participants had high quality fMRI data. Exclusion criteria were specified as an “aqi” index > 0.025, a signal to noise ratio > 1, a root-mean-square head motion less than 2mm for translations and less than 1° for rotation. The “aqi” index is AFNI's mean quality index computed by the *3dTqual* routine. With these criteria, one LLD participant (03006) was removed for excessive head motion.

**Appendix 1** to Roy J-C, Desmidt T, Dam S, et al. Connectivity patterns of the core resting-state networks associated with apathy in late-life depression. *J Psychiatry Neurosci* 2023.

Copyright © 2023 The Author(s) or their employer(s).

To receive this resource in an accessible format, please contact us at [cmajgroup@cmaj.ca](mailto:cmajgroup@cmaj.ca).

DOI: 10.1503/jpn.230008

*Online appendices are unedited and posted as supplied by the authors.*

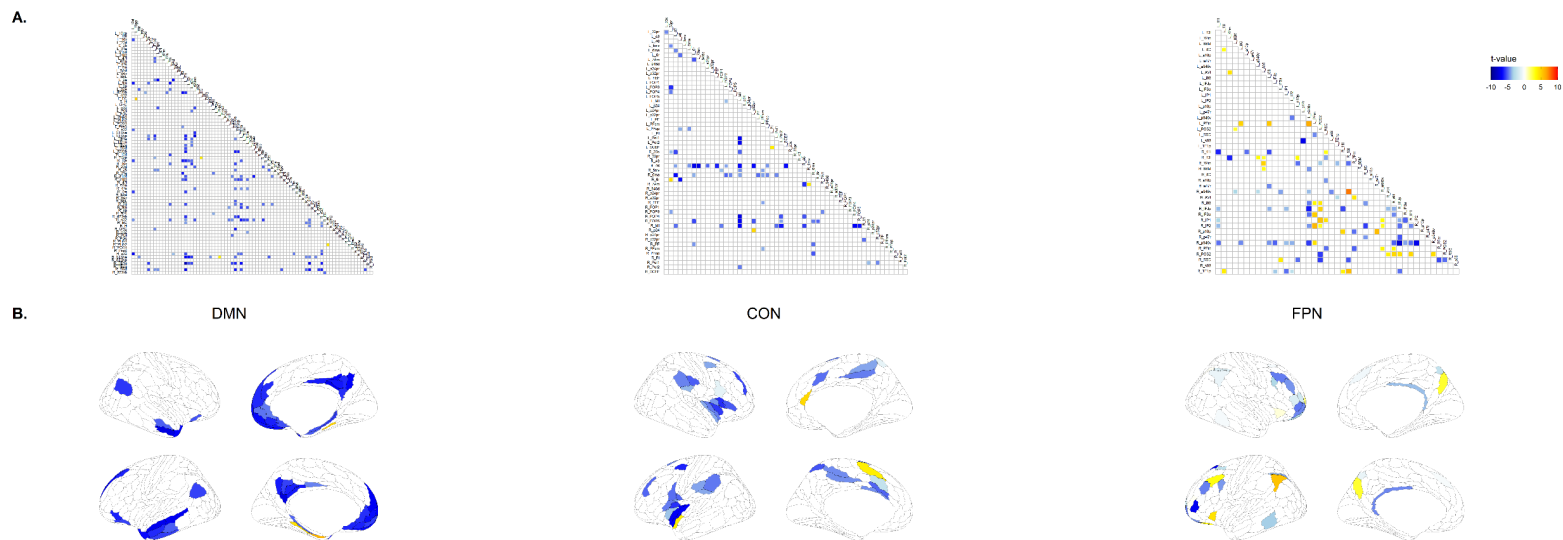

### **Fig S2. Subnetworks associated with late life depression**

**A.** Brain regions whose connectivity is significantly modified in late-life depression for each resting-state network. For interpretation purposes, the effect size of the association between ROI-to-ROI connectivity and the depression group is represented in color. **B.** The same brain regions are represented on the Glasser atlas (except for L\_10pp). For interpretation purposes, the marginal mean effect of each ROI associated with the depression group is represented in color). Brain regions belonging to the network are delimited in red.

**Acronyms:** CON: cingulo-opercular network, DMN: default-mode network, FPN: fronto-parietal network.

**Appendix 1** to Roy J-C, Desmidt T, Dam S, et al. Connectivity patterns of the core resting-state networks associated with apathy in late-life depression. *J Psychiatry Neurosci* 2023. Copyright © 2023 The Author(s) or their employer(s).

To receive this resource in an accessible format, please contact us at [cmajgroup@cmaj.ca](mailto:cmajgroup@cmaj.ca).

DOI: 10.1503/jpn.230008

Online appendices are unedited and posted as supplied by the authors.

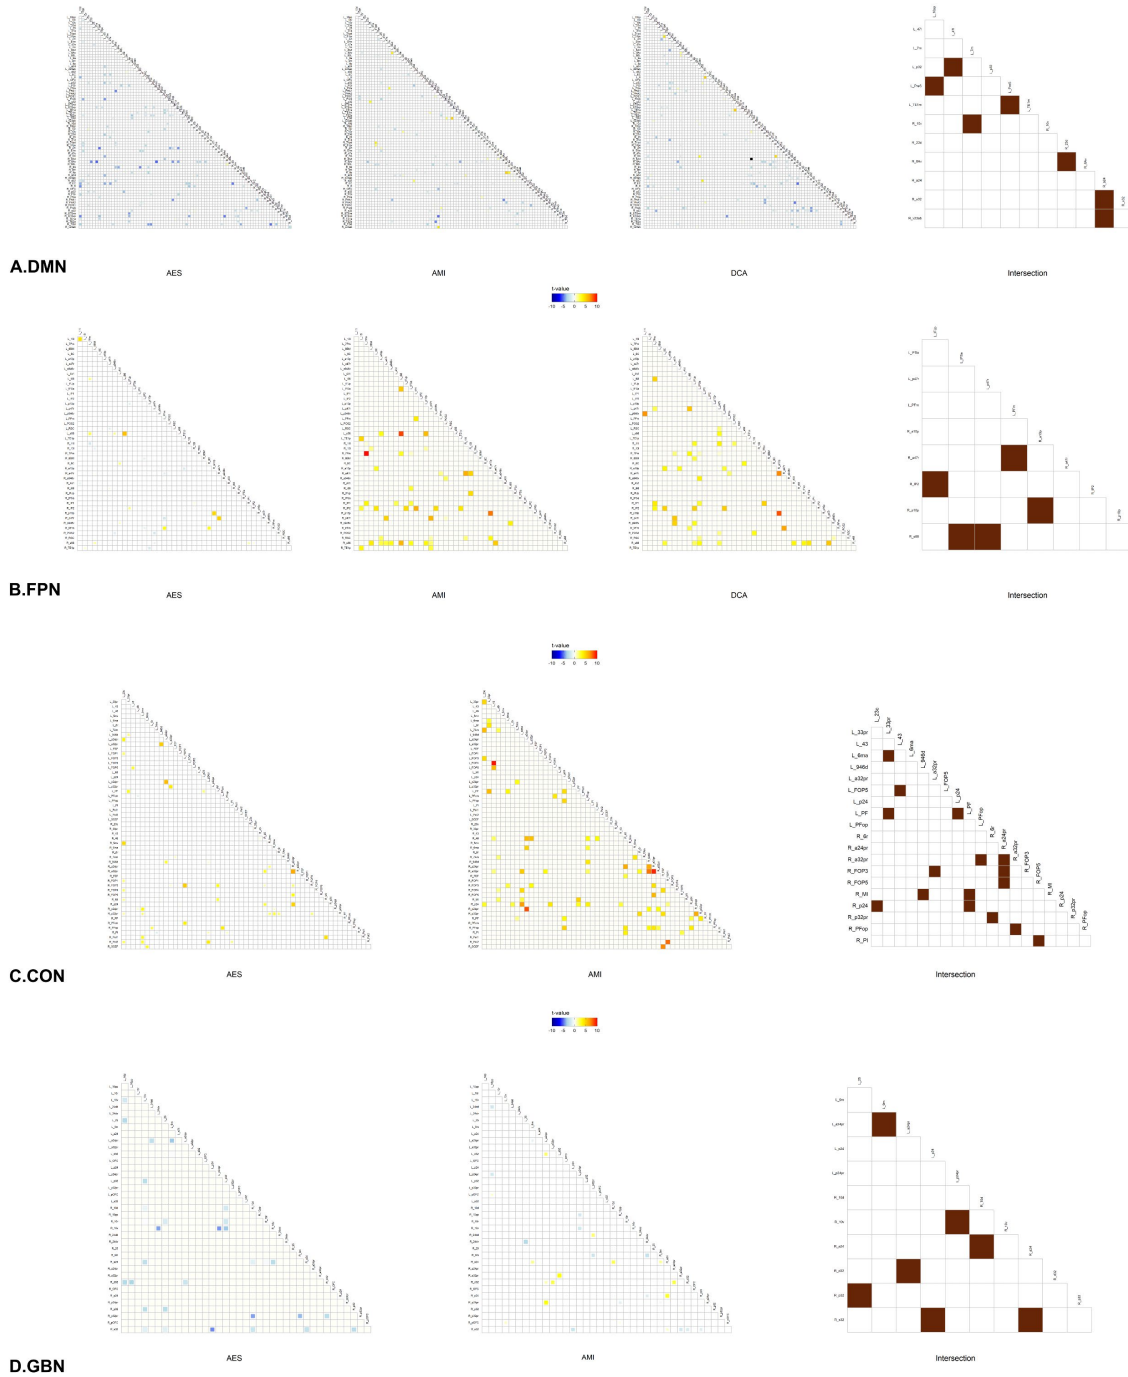

**Appendix 1** to Roy J-C, Desmidt T, Dam S, et al. Connectivity patterns of the core resting-state networks associated with apathy in late-life depression. *J Psychiatry Neurosci* 2023.

Copyright © 2023 The Author(s) or their employer(s).

To receive this resource in an accessible format, please contact us at [cmajgroup@cmaj.ca](mailto:cmajgroup@cmaj.ca).

DOI: 10.1503/jpn.230008

*Online appendices are unedited and posted as supplied by the authors.*

**Fig S3. Subnetworks associated with apathy for each apathy scale**

Brain regions whose connectivity is significantly associated with apathy for each resting-state network: **A.** for the DMN, **B.** for the FPN, **C.** for the CON and **D.** for the GOB goal network. Connectivity matrices are reported for each scale as well as the intersection between the scales. **Acronyms:** AES: Apathy Evaluation Scale, AMI: Apathy Motivation Index, CON: cingulo-opercular network, DCA: 2018 Diagnostic Criteria for Apathy, DMN: default-mode network, FPN: fronto-parietal network.

**Appendix 1** to Roy J-C, Desmidt T, Dam S, et al. Connectivity patterns of the core resting-state networks associated with apathy in late-life depression. *J Psychiatry Neurosci* 2023. Copyright © 2023 The Author(s) or their employer(s).

To receive this resource in an accessible format, please contact us at [cmaigroup@cmaj.ca](mailto:cmaigroup@cmaj.ca).

DOI: 10.1503/jpn.230008

Online appendices are unedited and posted as supplied by the authors.

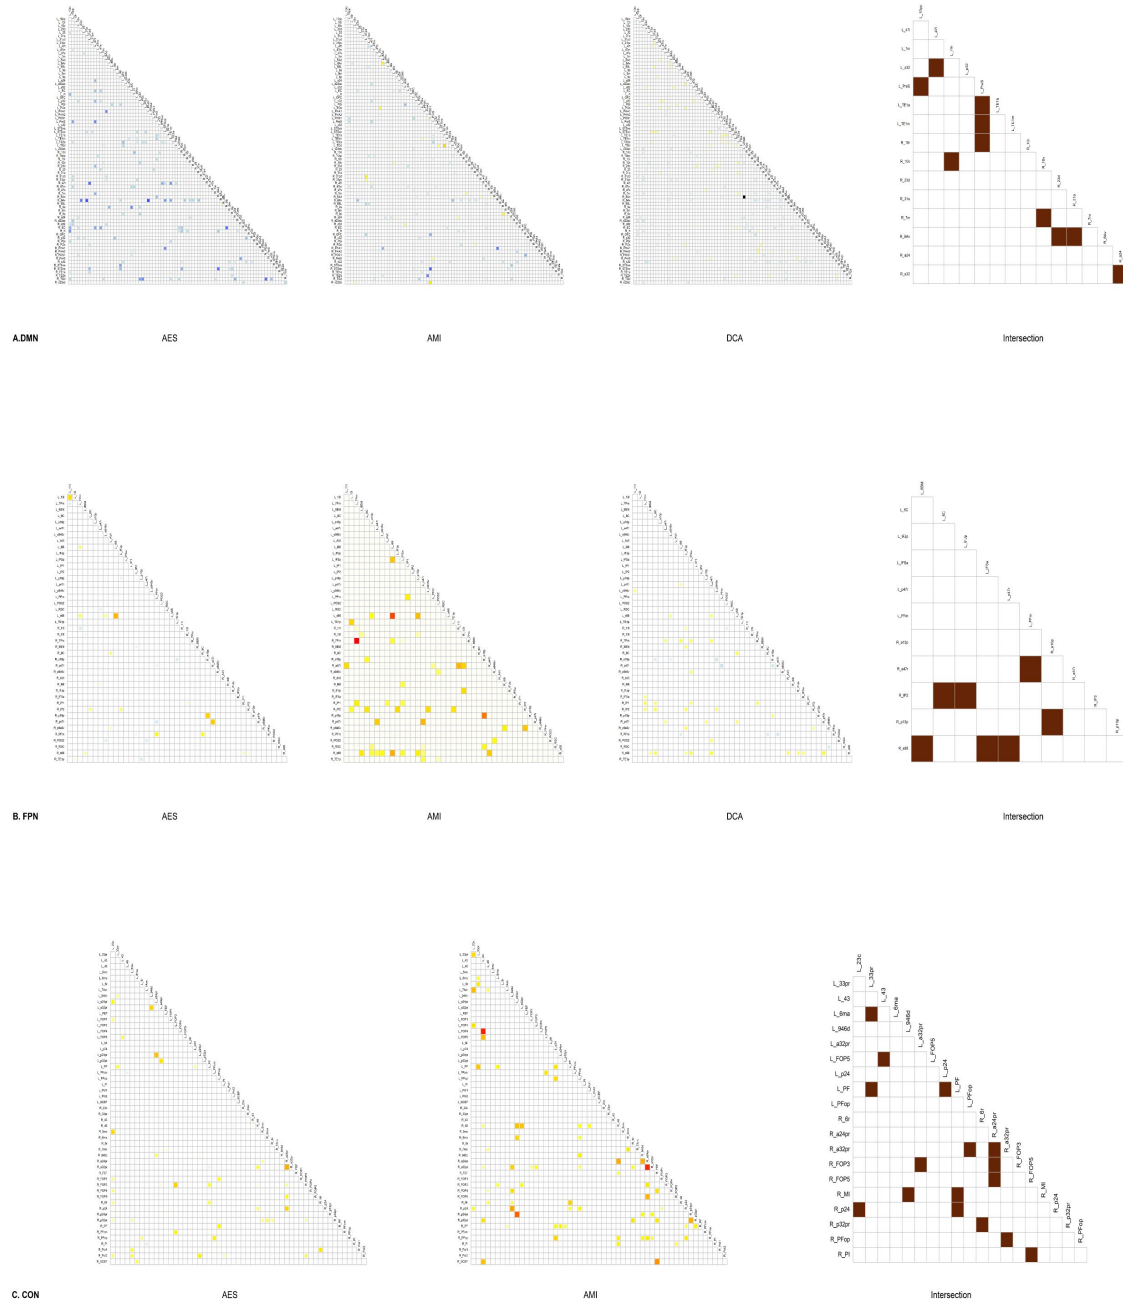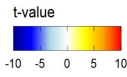

**Appendix 1** to Roy J-C, Desmidt T, Dam S, et al. Connectivity patterns of the core resting-state networks associated with apathy in late-life depression. *J Psychiatry Neurosci* 2023.

Copyright © 2023 The Author(s) or their employer(s).

To receive this resource in an accessible format, please contact us at [cmajgroup@cmaj.ca](mailto:cmajgroup@cmaj.ca).

DOI: 10.1503/jpn.230008

*Online appendices are unedited and posted as supplied by the authors.*

**Fig S4. Subnetworks associated with apathy with MADRS as covariate**

Brain regions whose connectivity is significantly modified in late-life depression for each resting-state network adding the modified MADRS as covariates; **A.** for the DMN, **B.** for the FPN and **C.** for the CON. Connectivity matrices are reported for each scale as well as the intersection between the scales. **Acronyms:** AES: Apathy Evaluation Scale, AMI: Apathy Motivation Index, CON: cingulo-opercular network, DCA: 2018 Diagnostic Criteria for Apathy, DMN: default-mode network, FPN: fronto-parietal network.

**Appendix 1** to Roy J-C, Desmidt T, Dam S, et al. Connectivity patterns of the core resting-state networks associated with apathy in late-life depression. *J Psychiatry Neurosci* 2023.

Copyright © 2023 The Author(s) or their employer(s).

To receive this resource in an accessible format, please contact us at [cmajgroup@cmaj.ca](mailto:cmajgroup@cmaj.ca).

DOI: 10.1503/jpn.230008

*Online appendices are unedited and posted as supplied by the authors.*

## References

1. Marin RS, Biedrzycki RC, Firinciogullari S. Reliability and validity of the Apathy Evaluation Scale. *Psychiatry Res.* 1991 Aug;38(2):143-62.
2. Clarke DE, Reekum R van, Simard M, Streiner DL, Freedman M, Conn D. Apathy in Dementia: An Examination of the Psychometric Properties of the Apathy Evaluation Scale. *JNP.* 2007 Jan;19(1):57-64.
3. Lenth R (2022). emmeans: Estimated Marginal Means, aka Least-Squares Means. R package, version 1.8.2, <<https://CRAN.R-project.org/package=emmeans>>.



**Appendix 1** to Roy J-C, Desmidt T, Dam S, et al. Connectivity patterns of the core resting-state networks associated with apathy in late-life depression. *J Psychiatry Neurosci* 2023. Copyright © 2023 The Author(s) or their employer(s). To receive this resource in an accessible format, please contact us at [cmajgroup@cmaj.ca](mailto:cmajgroup@cmaj.ca).

DOI: 10.1503/jpn.230008

*Online appendices are unedited and posted as supplied by the authors.*

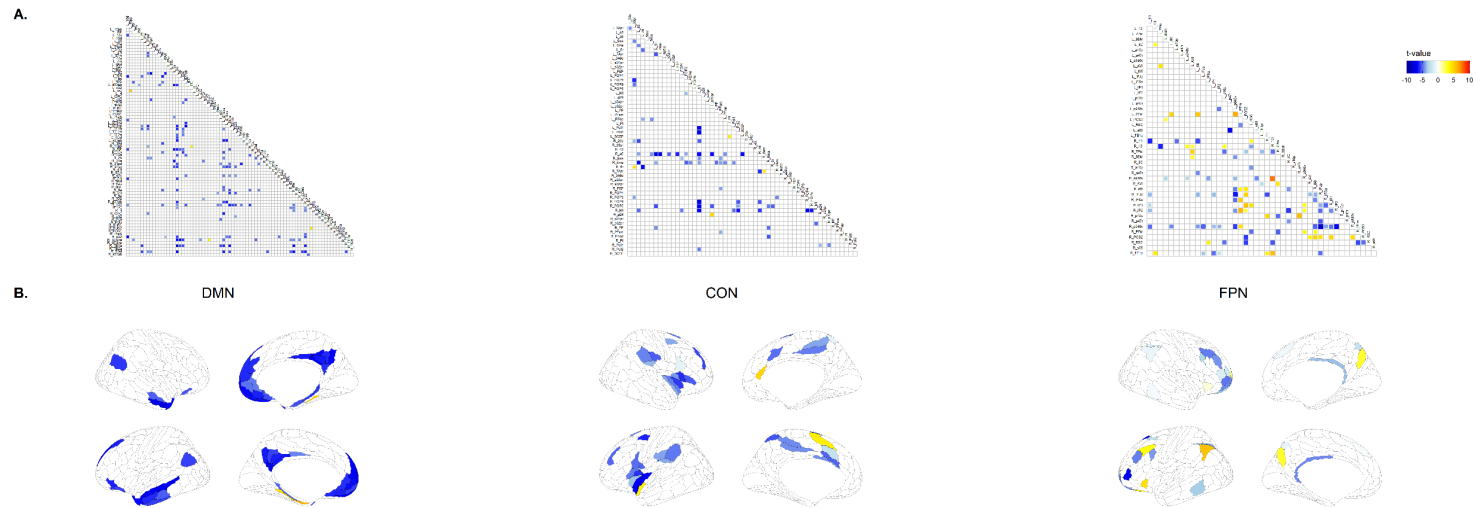

**Appendix 1** to Roy J-C, Desmidt T, Dam S, et al. Connectivity patterns of the core resting-state networks associated with apathy in late-life depression. *J Psychiatry Neurosci* 2023. Copyright © 2023 The Author(s) or their employer(s).  
To receive this resource in an accessible format, please contact us at [cmajgroup@cmaj.ca](mailto:cmajgroup@cmaj.ca).

DOI: 10.1503/jpn.230008

*Online appendices are unedited and posted as supplied by the authors.*
